# Supplementary material for: A new triazine bearing a pyrazolone group capable of copper, nickel, and zinc chelation
Source: PubMed Central journal article supplement (PMC5831559; doi:10.1039/c7ra09459k), 2018-01-16
Supplement: NIHMS933747-supplement-ESI_1.pdf [file NIHMS933747-supplement-ESI_1.pdf]

## SUPPORTING INFORMATION

### A new triazine bearing a pyralozone group capable of copper, nickel, and zinc chelation

Akop Yepremyan<sup>a</sup>, Arshad Mehmood<sup>a</sup>, Samantha Brewer<sup>a</sup>, Madalyn M. Barnett<sup>a</sup>, Benjamin G. Janesko<sup>a</sup>, Giridhar Akkaraju<sup>b</sup>, Eric E. Simanek<sup>a\*</sup>, and Kayla N. Green<sup>a\*</sup>

Department of Chemistry and Biochemistry, Texas Christian University, Fort Worth, Texas 76129

#### Table of Contents

|                                                                                                          |    |
|----------------------------------------------------------------------------------------------------------|----|
| <b>Table S1.</b> Crystal data collection and structure refinement statistics .....                       | 3  |
| <b>Figure S1.</b> <sup>1</sup> H NMR spectrum of molecule <b>2</b> in CDCl <sub>3</sub> .....            | 4  |
| <b>Figure S2.</b> <sup>13</sup> C NMR spectrum of molecule <b>2</b> in CDCl <sub>3</sub> .....           | 5  |
| <b>Figure S3.</b> HR-MS spectrum of molecule <b>2</b> .....                                              | 6  |
| <b>Figure S4.</b> <sup>1</sup> H NMR spectrum of molecule <b>3</b> in CDCl <sub>3</sub> .....            | 7  |
| <b>Figure S5.</b> <sup>13</sup> C NMR spectrum of molecule <b>3</b> in CDCl <sub>3</sub> .....           | 8  |
| <b>Figure S6.</b> HR-MS spectrum of molecule <b>3</b> .....                                              | 9  |
| <b>Figure S7.</b> <sup>1</sup> H NMR spectrum of molecule <b>4</b> in DMSO <sub>d-6</sub> .....          | 10 |
| <b>Figure S8.</b> <sup>13</sup> C NMR spectrum of molecule <b>4</b> in DMSO <sub>d-6</sub> .....         | 11 |
| <b>Figure S9.</b> HR-MS spectrum of molecule <b>4</b> .....                                              | 12 |
| <b>Figure S10.</b> <sup>1</sup> H, spectrum of molecule <b>5</b> in CDCl <sub>3</sub> .....              | 13 |
| <b>Figure S11.</b> <sup>13</sup> C NMR spectrum of molecule <b>5</b> in CDCl <sub>3</sub> .....          | 14 |
| <b>Figure S12.</b> HR-MS spectrum of molecule <b>5</b> .....                                             | 15 |
| <b>Figure S13.</b> <sup>1</sup> H NMR spectrum of molecule <b>1</b> in DMSO <sub>d-6</sub> .....         | 16 |
| <b>Figure S14.</b> <sup>1</sup> H NMR spectrum of molecule <b>1</b> in D <sub>2</sub> O. ....            | 17 |
| <b>Figure S15.</b> <sup>13</sup> C NMR spectrum of molecule <b>1</b> in DMSO <sub>d-6</sub> .....        | 18 |
| <b>Figure S16.</b> <sup>13</sup> C NMR spectrum of molecule <b>1</b> in D <sub>2</sub> O.....            | 19 |
| <b>Figure S17.</b> HSQC spectrum of molecule <b>1</b> in D <sub>2</sub> O.....                           | 20 |
| <b>Figure S18.</b> <sup>1</sup> H NMR spectrum of molecule <b>1</b> in D <sub>2</sub> O after 18 h.....  | 21 |
| <b>Figure S19.</b> <sup>13</sup> C NMR spectrum of molecule <b>1</b> in D <sub>2</sub> O after 10 h..... | 22 |

|                                                                                                                                            |    |
|--------------------------------------------------------------------------------------------------------------------------------------------|----|
| <b>Figure S20.</b> HR-MS spectrum of molecule <b>1</b> .....                                                                               | 23 |
| <b>Figure S21.</b> IR spectrum of molecule <b>1</b> in D <sub>2</sub> O.....                                                               | 24 |
| <b>Figure S22.</b> HR-MS spectrum of molecule <b>6</b> .....                                                                               | 25 |
| <b>Figure S23.</b> Molecular structure of molecule <b>6</b> .....                                                                          | 26 |
| <b>Figure S24.</b> IR spectrum of molecule <b>6</b> .....                                                                                  | 27 |
| <b>Figure S25.</b> HR-MS spectrum of molecule <b>7</b> .....                                                                               | 28 |
| <b>Figure S26.</b> Molecular structure of molecule <b>7</b> .....                                                                          | 29 |
| <b>Figure S27.</b> IR spectrum of molecule <b>7</b> .....                                                                                  | 30 |
| <b>Figure S28.</b> <sup>1</sup> H NMR spectrum of molecule <b>8</b> in DMSO <sub>d-6</sub> .....                                           | 31 |
| <b>Figure S29.</b> HR-MS spectrum of molecule <b>8</b> .....                                                                               | 32 |
| <b>Figure S30.</b> Molecular structure of molecule <b>8</b> .....                                                                          | 33 |
| <b>Figure S31.</b> IR spectrum of molecule <b>8</b> .....                                                                                  | 34 |
| <b>Figure S32.</b> Cyclic voltammogram of complex <b>6</b> .....                                                                           | 35 |
| <b>Figure S33.</b> Fluorescence measured for CCA [500 μM] and ascorbate [300 μM] with Cu(II) [10 μM]<br>.....                              | 35 |
| <b>Figure S34.</b> Fluorescence measured for CCA [500 μM] and ascorbate [300 μM] with Cu(II) [10 μM]<br>and molecule <b>1</b> [10 μM]..... | 36 |
| <b>Figure S35.</b> Fluorescence measured for CCA [500 μM] and ascorbate [300 μM] with Cu(II) [10 μM]<br>and molecule <b>1</b> [10 μM]..... | 36 |
| <b>Figure S34.</b> Fluorescence measured for CCA [500 μM] and ascorbate [300 μM] with Cu(II) [10 μM]<br>and molecule <b>1</b> [10 μM]..... | 36 |
| <b>Table S2.</b> Geometric parameters <i>i.e.</i> bond lengths and angles (Å, °) for <b>6</b> .....                                        | 37 |
| <b>Table S3.</b> Geometric parameters <i>i.e.</i> bond lengths and angles (Å, °) for <b>7</b> .....                                        | 41 |
| <b>Table S4.</b> Geometric parameters <i>i.e.</i> bond lengths and angles (Å, °) for <b>8</b> .....                                        | 45 |

### $\tau$ -value calculation\*

The  $\tau$ -value was calculated according to the formula defined by Addison [ $\tau = (\beta - \alpha)/60$ ], where  $\alpha^\circ = \text{N}(4)\text{-M-Cl}(1)$  and  $\beta^\circ = \text{N}(1)\text{-M-N}(3)$  are the angles that define the basal plane. Please note that for a perfect square-pyramidal species  $\tau = 0.00$ , and for a perfect trigonal bi-pyramidal species,  $\tau = 1.00$ .

#### For Cu1 complex

$$\text{N4-Cu1-Cl1} = 170.31^\circ$$

$$\text{N6-Cu1-O2} = 166.42^\circ$$

$$\tau = (170.31^\circ - 166.42^\circ)/60 = 0.06^\circ$$

#### For Cu2 complex

$$\text{(a) N11-Cu2-Cl2} = 161.34^\circ$$

$$\text{(b) N14-Cu2-O5} = 166.34^\circ$$

$$\tau = (166.34^\circ - 161.34^\circ)/60 = 0.08^\circ$$

\*Based on: Addison, A. W.; Rao, N. T. *J. Chem. Soc. Dalton Trans.* **1984**, 1349-1356.

**Table S1.** Crystal data collection and structure refinement statistics for **6**, **7** and **8**.

|                                                               | <b>6</b>                                                                                       | <b>7</b>                                                                         | <b>8</b>                                                             |
|---------------------------------------------------------------|------------------------------------------------------------------------------------------------|----------------------------------------------------------------------------------|----------------------------------------------------------------------|
| Chemical formula                                              | C <sub>22</sub> H <sub>39</sub> Cl <sub>3</sub> Cu <sub>2</sub> N <sub>16</sub> O <sub>9</sub> | C <sub>22</sub> H <sub>32</sub> Cl <sub>2</sub> N <sub>16</sub> NiO <sub>7</sub> | C <sub>22</sub> H <sub>33</sub> ClN <sub>16</sub> O <sub>13</sub> Zn |
| Mr                                                            | 905.14                                                                                         | 762.23                                                                           | 830.48                                                               |
| Crystal System, Space group                                   | Triclinic, P-1                                                                                 | Triclinic, P-1                                                                   | Monoclinic, P2 <sub>1</sub> /c                                       |
| Temperature (K)                                               | 100                                                                                            | 100                                                                              | 100                                                                  |
| a, b, c (Å)                                                   | 11.3979(6), 12.0551(7),<br>13.6836(7)                                                          | 12.261(3), 12.784(4),<br>13.598(4)                                               | 12.4036(8), 19.8086(13),<br>14.3748(9)                               |
| $\alpha \beta \gamma$ (°)                                     | 97.586 (2), 103.997 (2),<br>106.156 (2)                                                        | 74.133(8), 70.006(8),<br>64.470(7)                                               | 90, 91.559(2), 90                                                    |
| D <sub>calc</sub> (g cm <sup>-3</sup> )                       | 1.756                                                                                          | 1.416                                                                            | 1.562                                                                |
| F(000)                                                        | 928                                                                                            | 788                                                                              | 1712                                                                 |
| Volume (Å <sup>3</sup> )                                      | 1711.75 (16)                                                                                   | 1787.3(9)                                                                        | 3530.6(4)                                                            |
| Z                                                             | 2                                                                                              | 2                                                                                | 4                                                                    |
| Radiation type                                                | Mo K $\alpha$ ( $\lambda$ = 0.71073 Å)                                                         | Mo K $\alpha$ ( $\lambda$ = 0.71073 Å)                                           | Mo K $\alpha$ ( $\lambda$ = 0.71073 Å)                               |
| Crystal shape & Color                                         | Needle, blue                                                                                   | Needle, colorless                                                                | Block, colorless                                                     |
| Crystal size (mm)                                             | 0.23 × 0.07 × 0.05                                                                             | 0.29 × 0.16 × 0.08                                                               | 0.33 × 0.12 × 0.11                                                   |
| $\mu$ (mm <sup>-1</sup> )                                     | 1.55                                                                                           | 0.75                                                                             | 0.86                                                                 |
| T <sub>min</sub> , T <sub>max</sub>                           | 0.876, 0.933                                                                                   | 0.868, 0.944                                                                     | 0.881, 0.914                                                         |
| $\theta$ (°)                                                  | 3.0–27.18                                                                                      | 3.1–26.9                                                                         | 3.0–26.4                                                             |
| # measured, independent                                       | 86344, 7595                                                                                    | 68001, 8066                                                                      | 123887, 7840                                                         |
| Completeness (%)                                              | 99.7                                                                                           | 100.0                                                                            | 100.0                                                                |
| R <sub>int</sub> (%)                                          | 0.060                                                                                          | 0.141                                                                            | 0.107                                                                |
| GOF on F <sup>2</sup>                                         | 1.046                                                                                          | 1.099                                                                            | 1.193                                                                |
| R <sub>1</sub> [I > 2 $\sigma$ (I)]/ R <sub>1</sub> (all)     | 0.039/0.056                                                                                    | 0.122/ 0.197                                                                     | 0.086/ 0.125                                                         |
| wR <sub>2</sub> [I > 2 $\sigma$ (I)]/ wR <sub>2</sub> (all)   | 0.082/0.089                                                                                    | 0.3076/0.358                                                                     | 0.1627 /0.176                                                        |
| $\theta_{\text{max}}/\theta_{\text{min}}$ (e/Å <sup>3</sup> ) | 2.20/ $\bar{1}$ .00                                                                            | 2.18/ $\bar{1}$ .20                                                              | 1.22/ $\bar{1}$ .06                                                  |

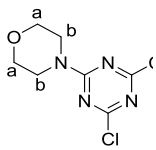

3.853  
3.717

a,b

4.00  
4.16

ppm  
1  
2  
3  
4  
5  
6  
7  
8  
9  
10  
11  
12

Figure S1.  $^1\text{H}$  NMR spectrum of molecule 2 in  $\text{CDCl}_3$ .

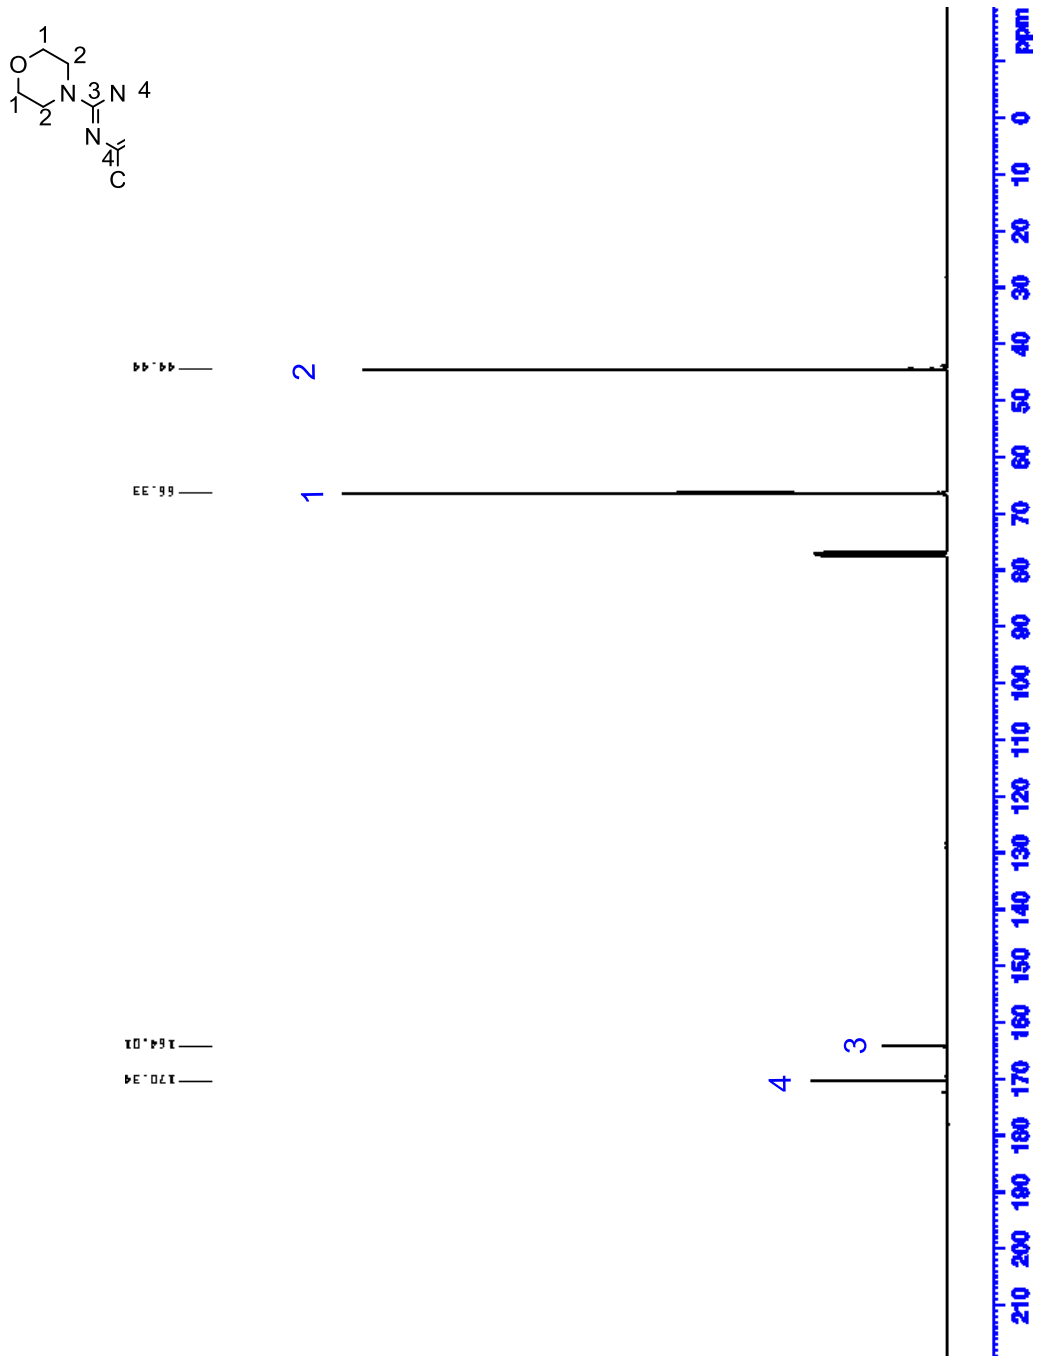

Figure S2.  $^{13}\text{C}$  NMR spectrum of molecule **2** in  $\text{CDCl}_3$ .

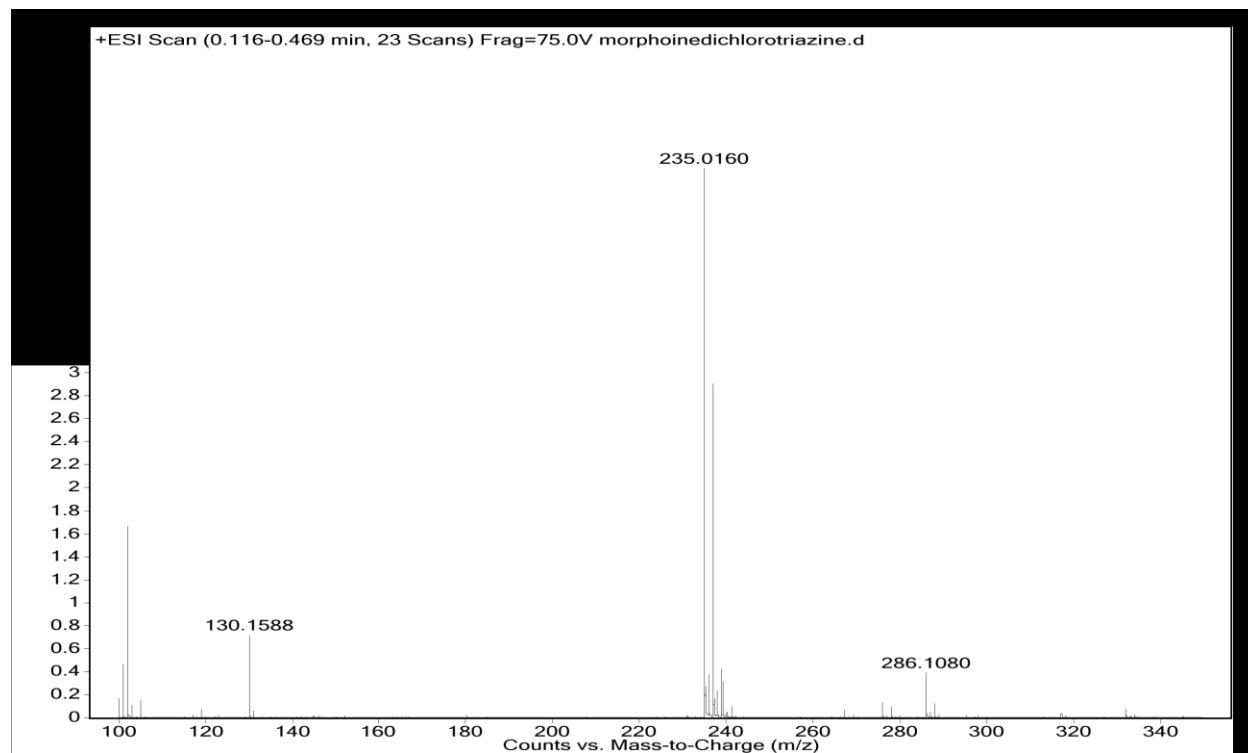

**Figure S3.** HR-MS spectrum of molecule 2.

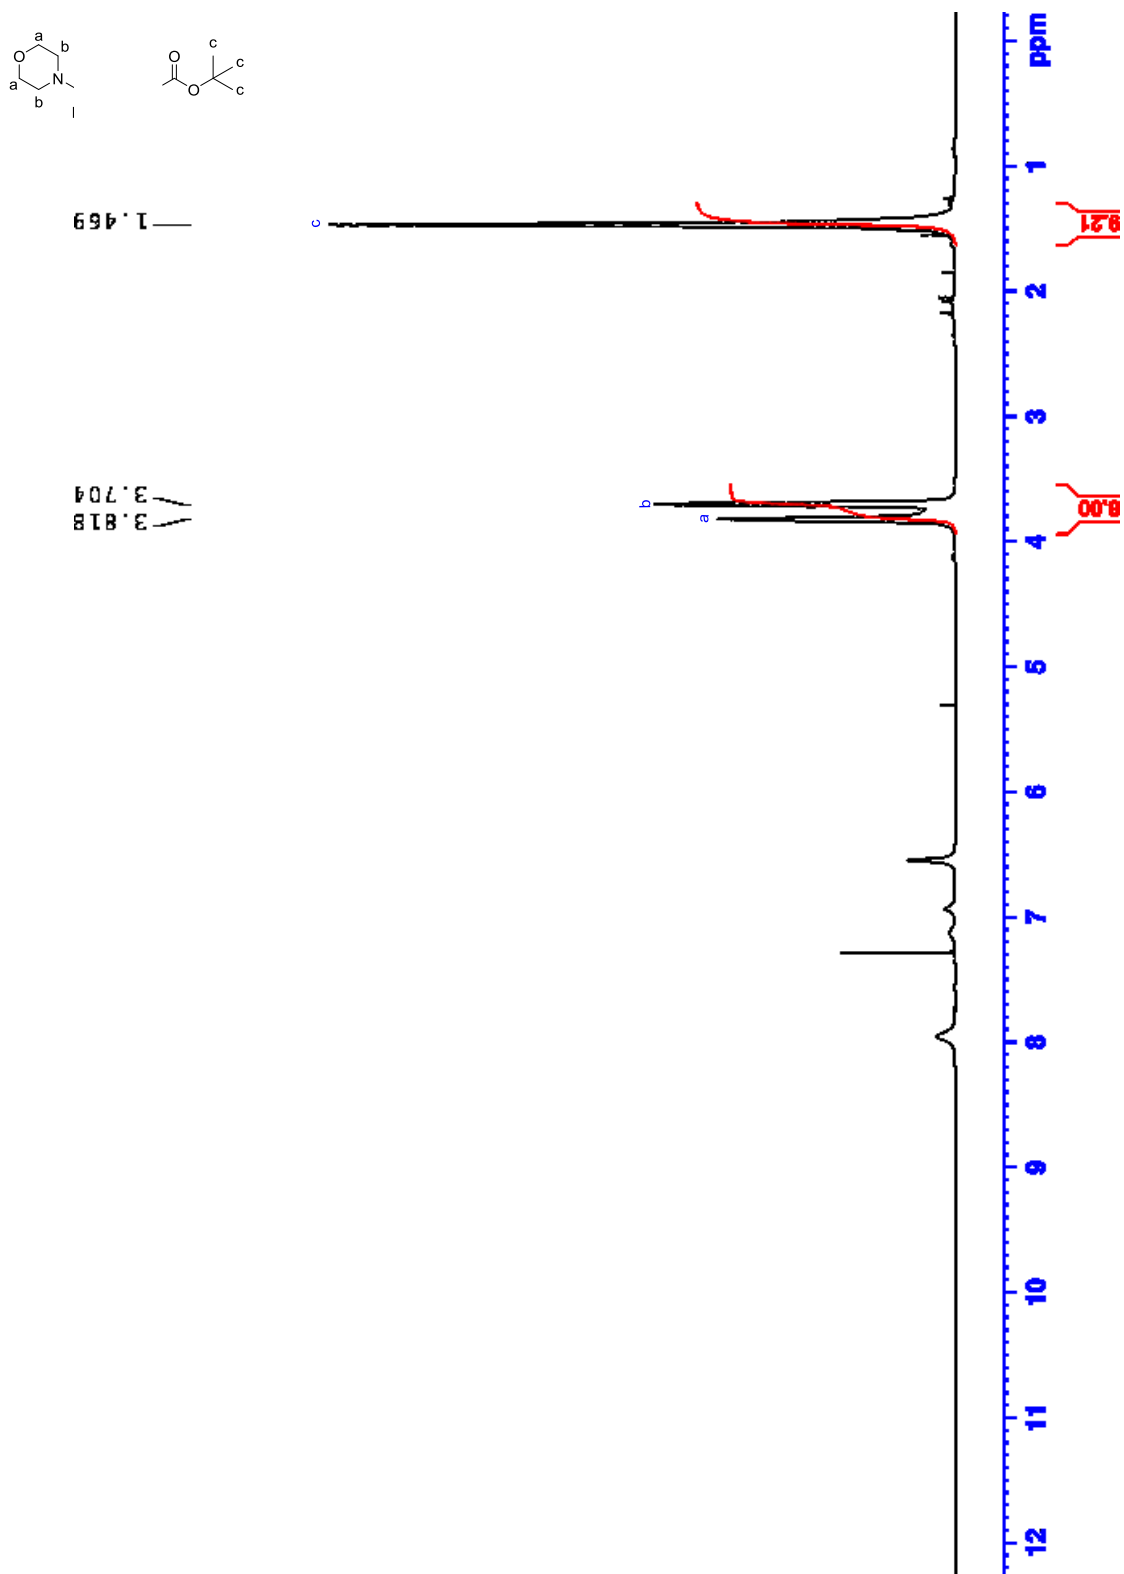

**Figure S4.**  $^1\text{H}$  NMR spectrum of molecule **3** in  $\text{CDCl}_3$ .

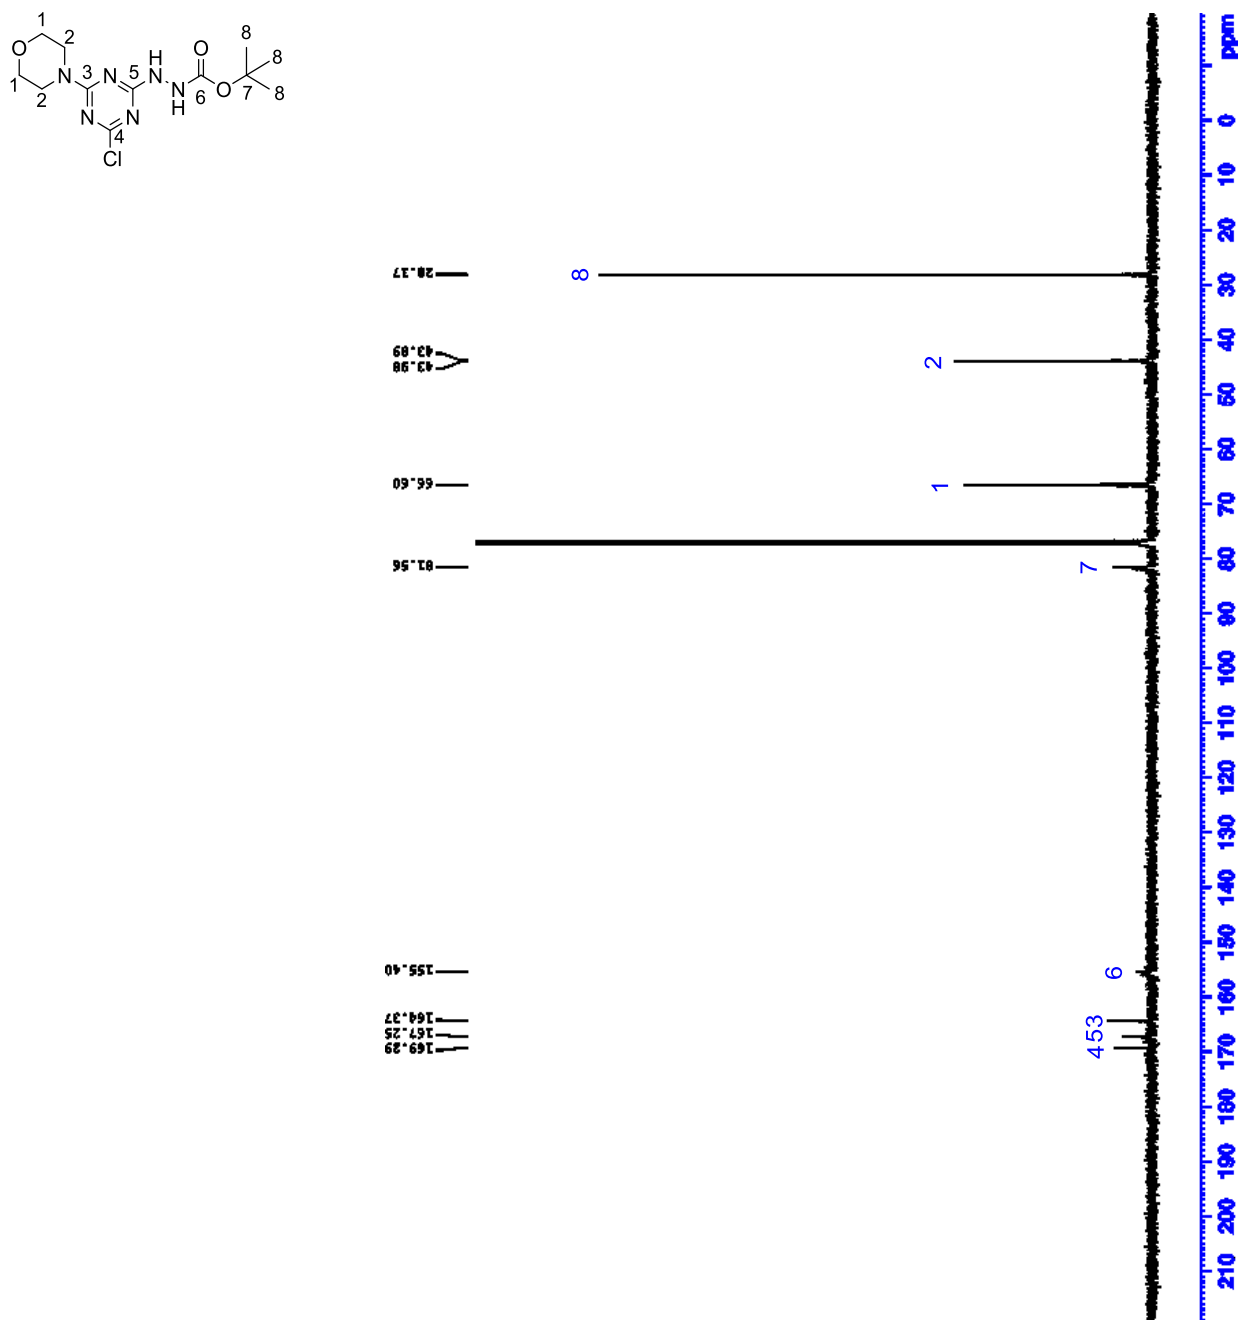

Figure S5.  $^{13}\text{C}$  NMR spectrum of molecule 3 in  $\text{CDCl}_3$ .



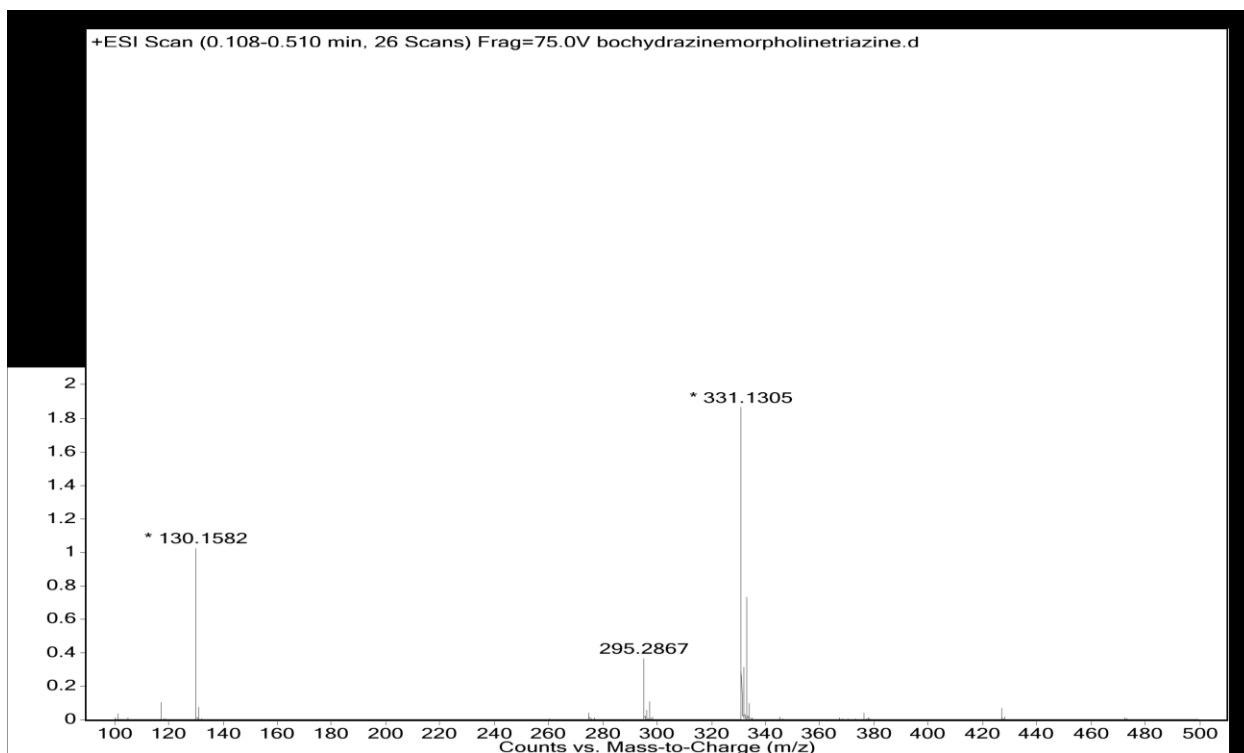

**Figure S6.** HR-MS spectrum of molecule **3**.

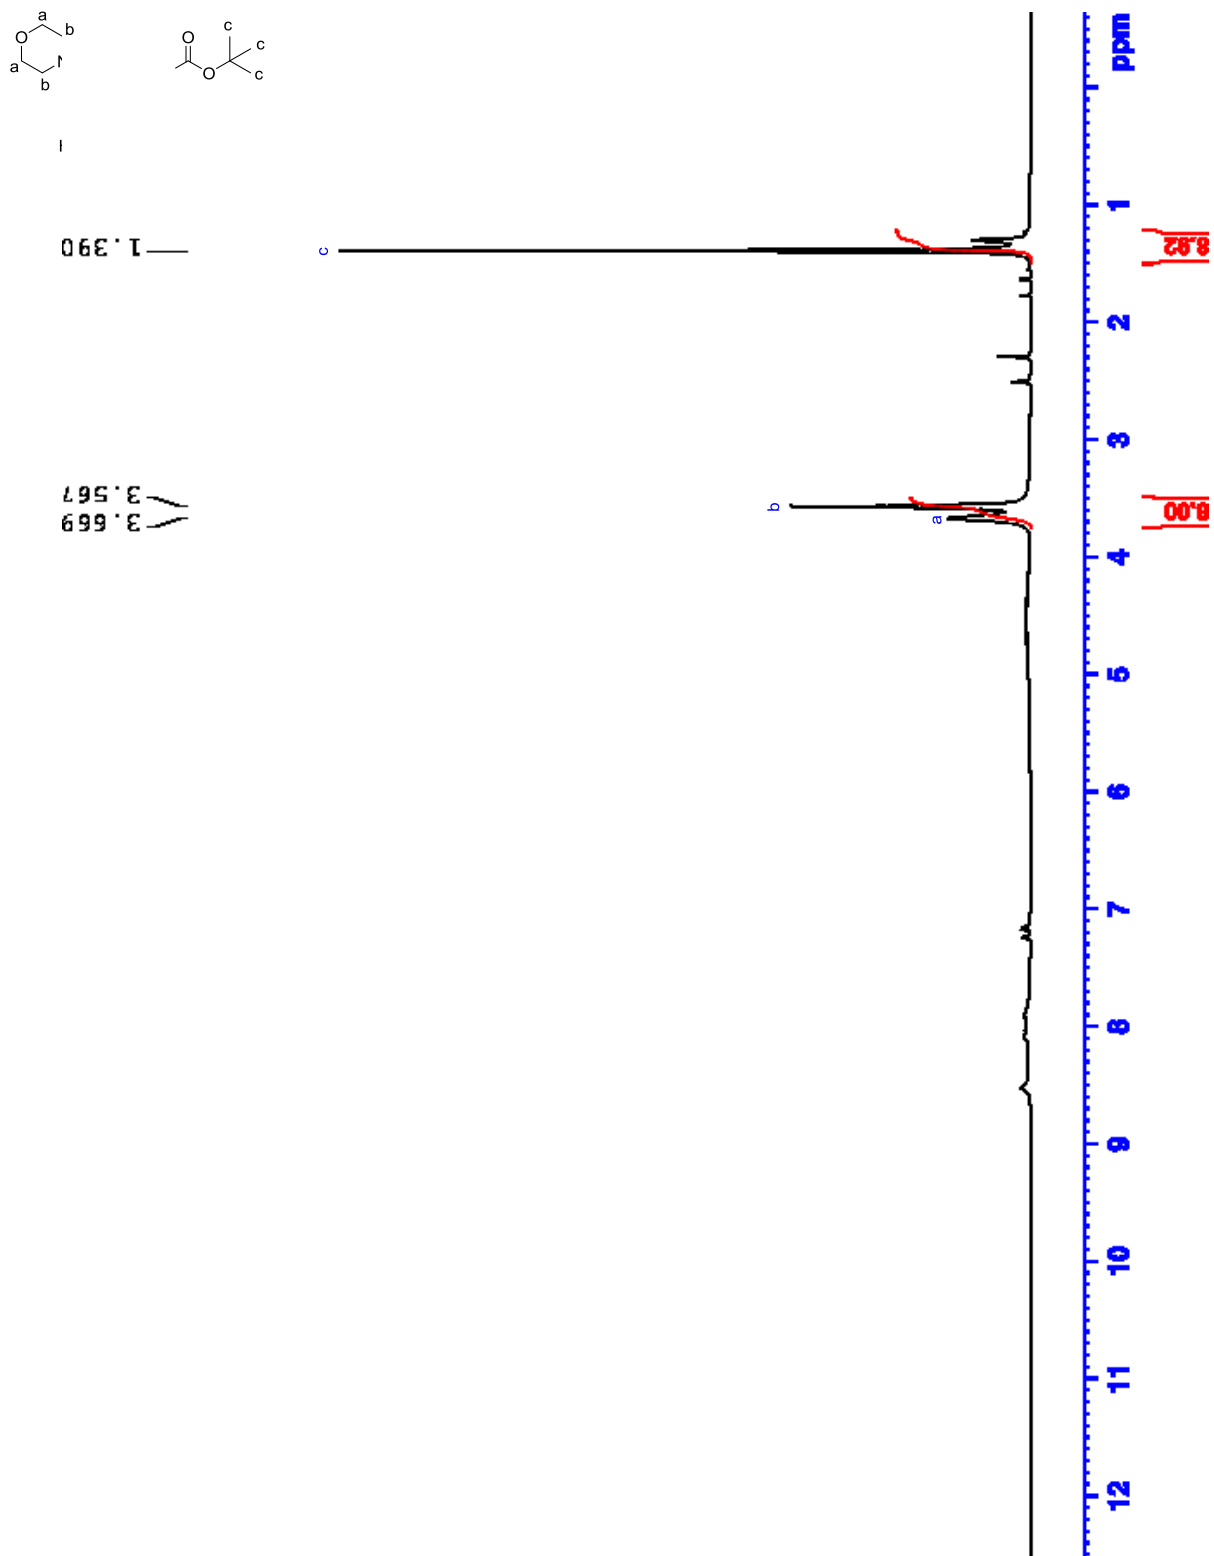

Figure S7.  $^1\text{H}$  NMR spectrum of molecule 4 in  $\text{DMSO-d}_6$ .

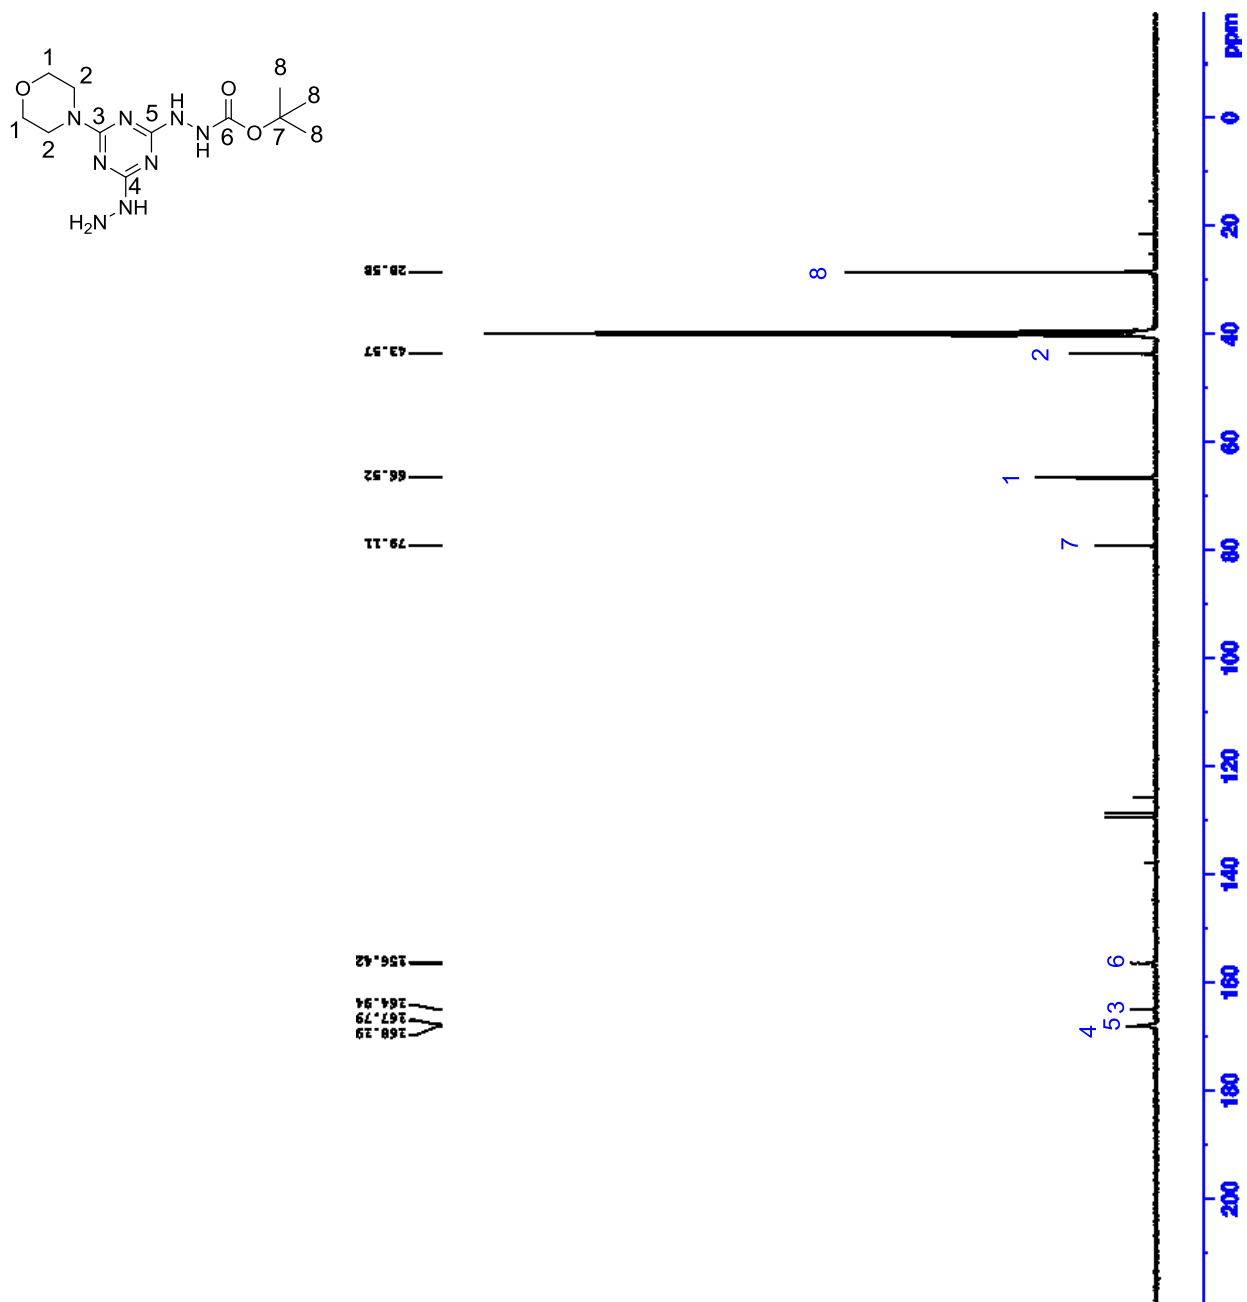

**Figure S8.**  $^{13}\text{C}$  NMR spectrum of molecule **4** in  $\text{DMSO-d}_6$ .

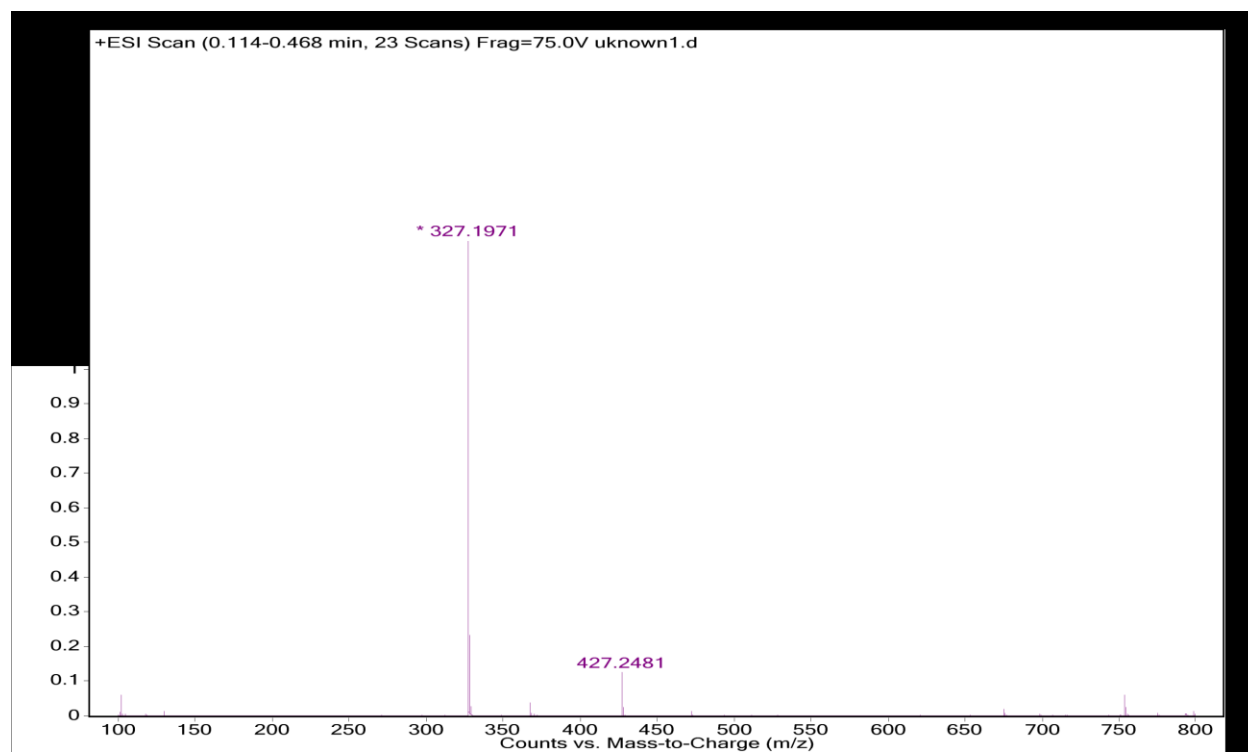

**Figure S9.** HR-MS spectrum of molecule 4.



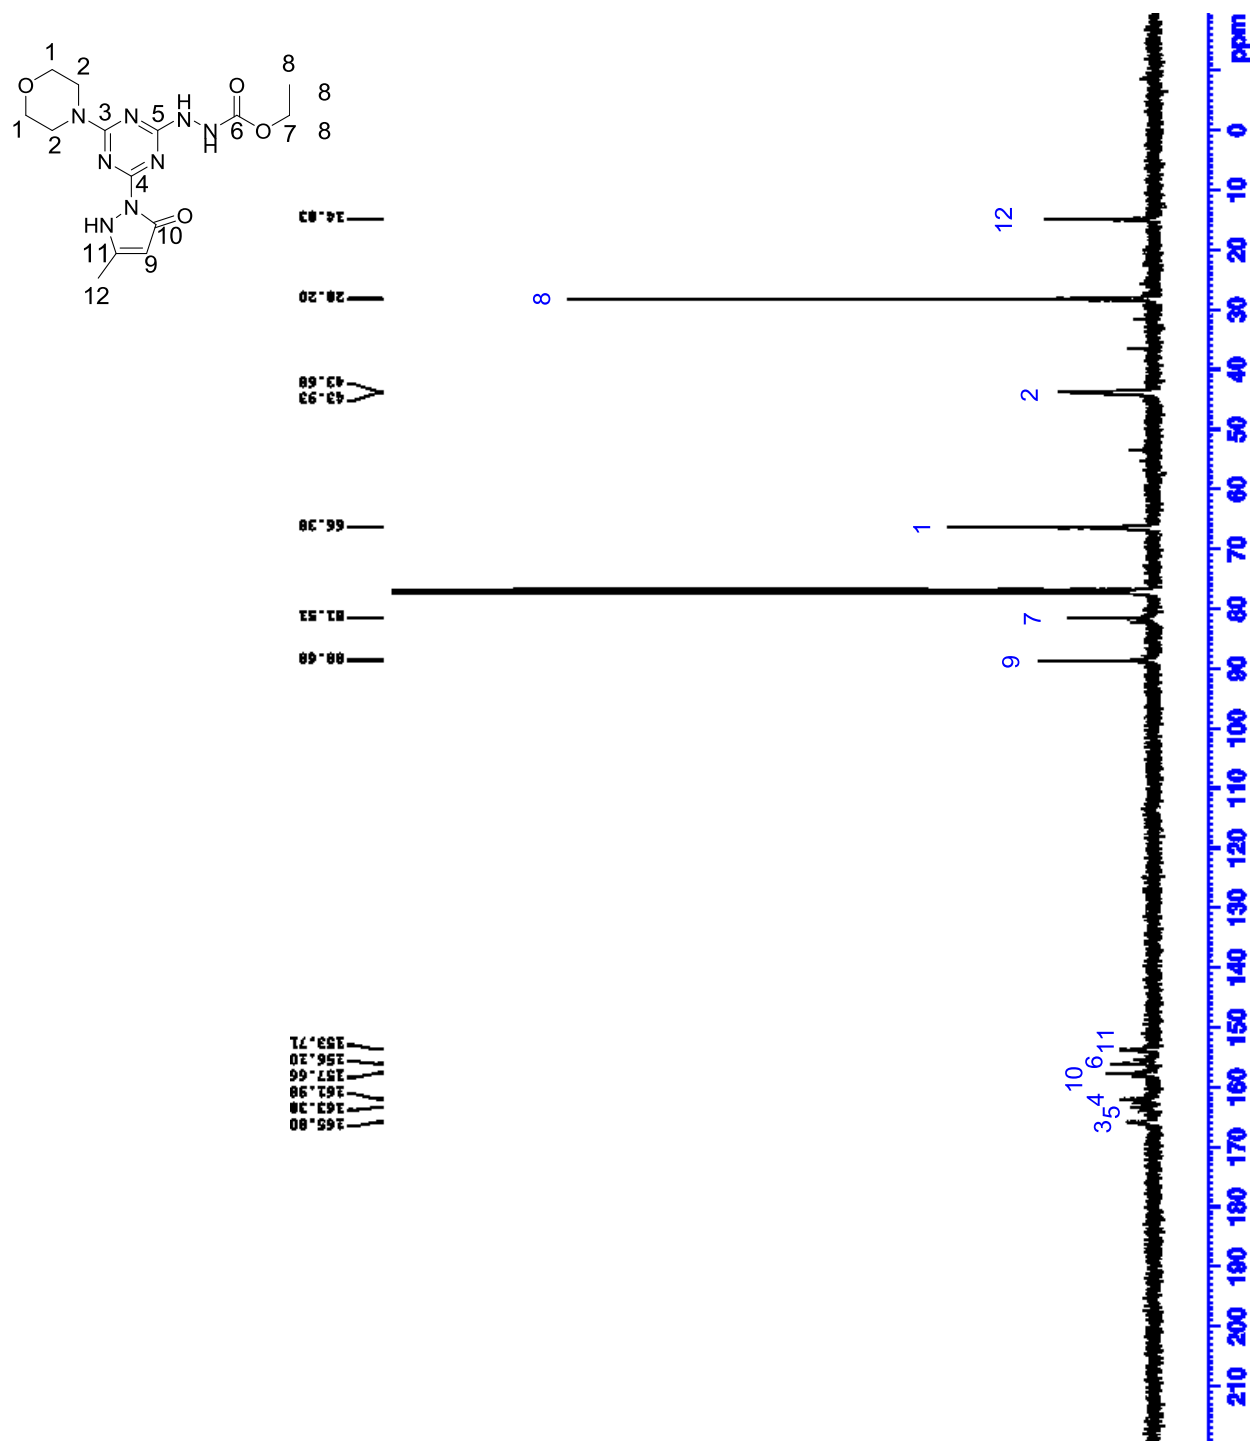

Figure S11. <sup>13</sup>C NMR spectrum of molecule 5 in CDCl<sub>3</sub>.

|               |                      |             |       |                 |              |                        |                      |
|---------------|----------------------|-------------|-------|-----------------|--------------|------------------------|----------------------|
| Sample Name   | bocprotectedligand   | Position    | P1-A1 | Instrument Name | Instrument 1 | User Name              |                      |
| Inj Vol       | -1                   | InjPosition |       | SampleType      | Sample       | IRM Calibration Status | All Ions Missed      |
| Data Filename | bocprotectedligand.d | ACQ Method  |       | Comment         |              | Acquired Time          | 6/15/2017 4:33:55 PM |

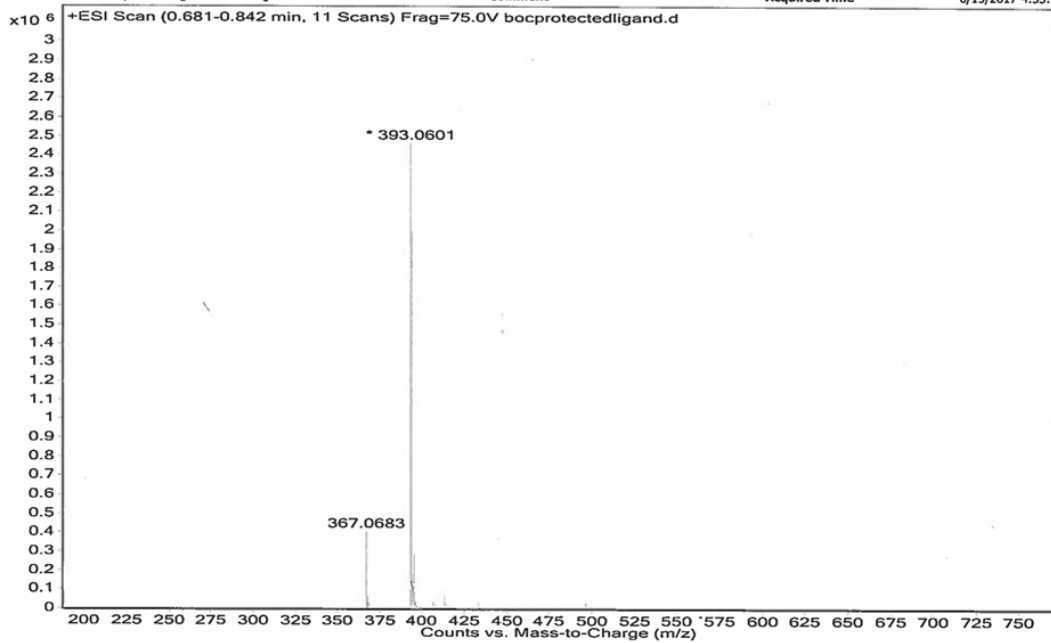

Figure S12. HR-MS spectrum of molecule 5.

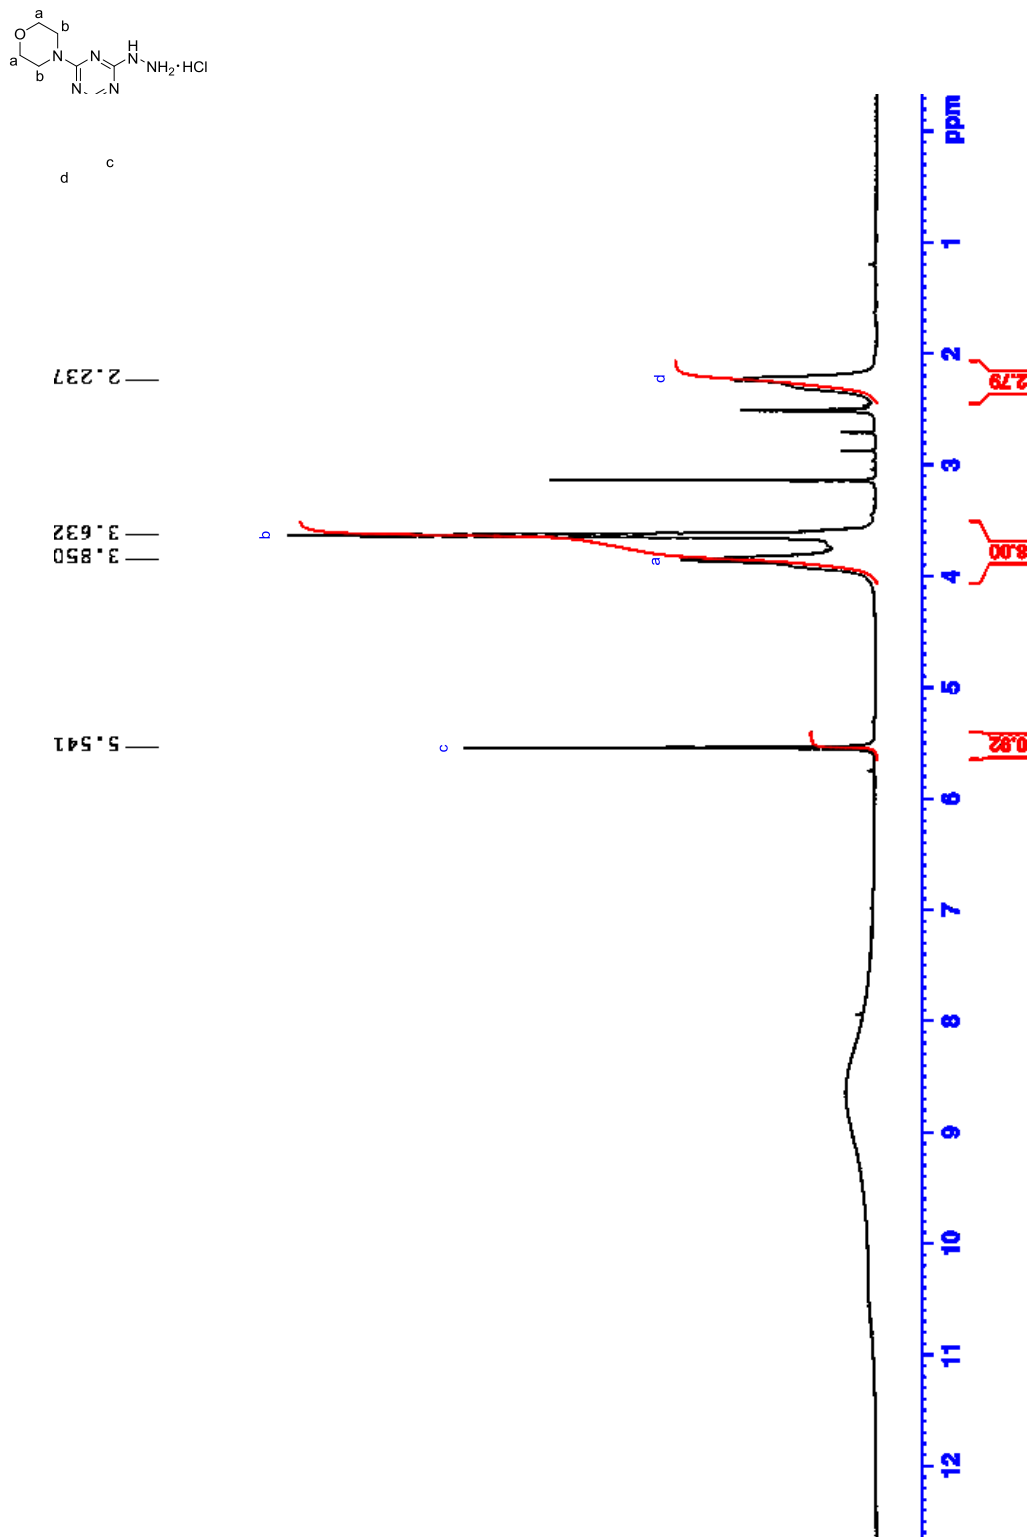

**Figure S13.**  $^1\text{H}$  NMR spectrum of molecule **1** in  $\text{DMSO-d}_6$ .



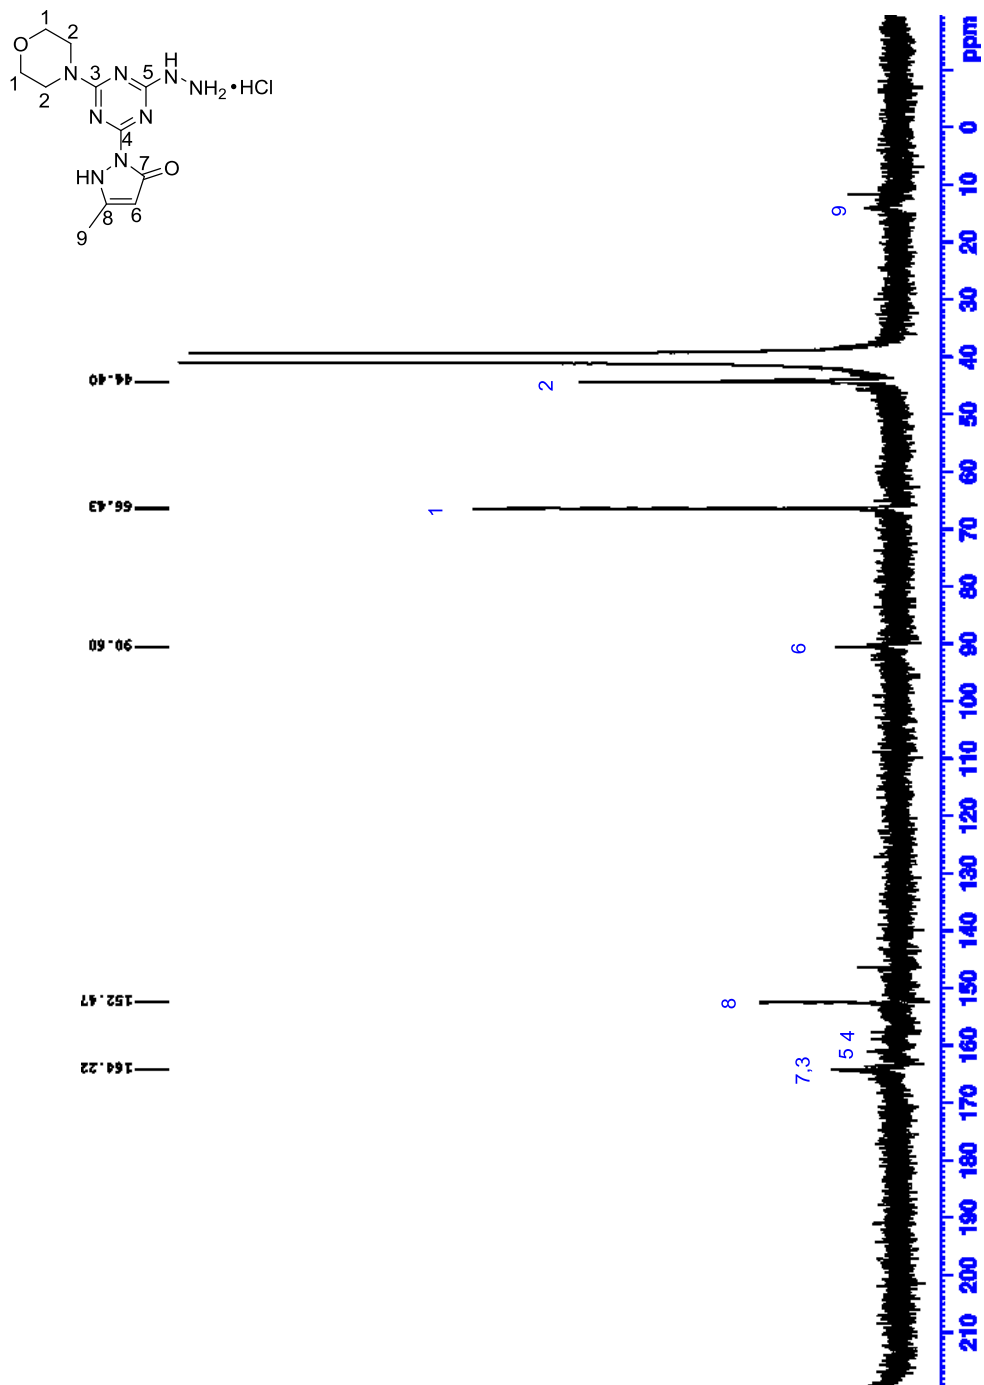

Figure S14.  $^{13}\text{C}$  NMR spectrum of molecule **1** in  $\text{DMSO-d}_6$ .

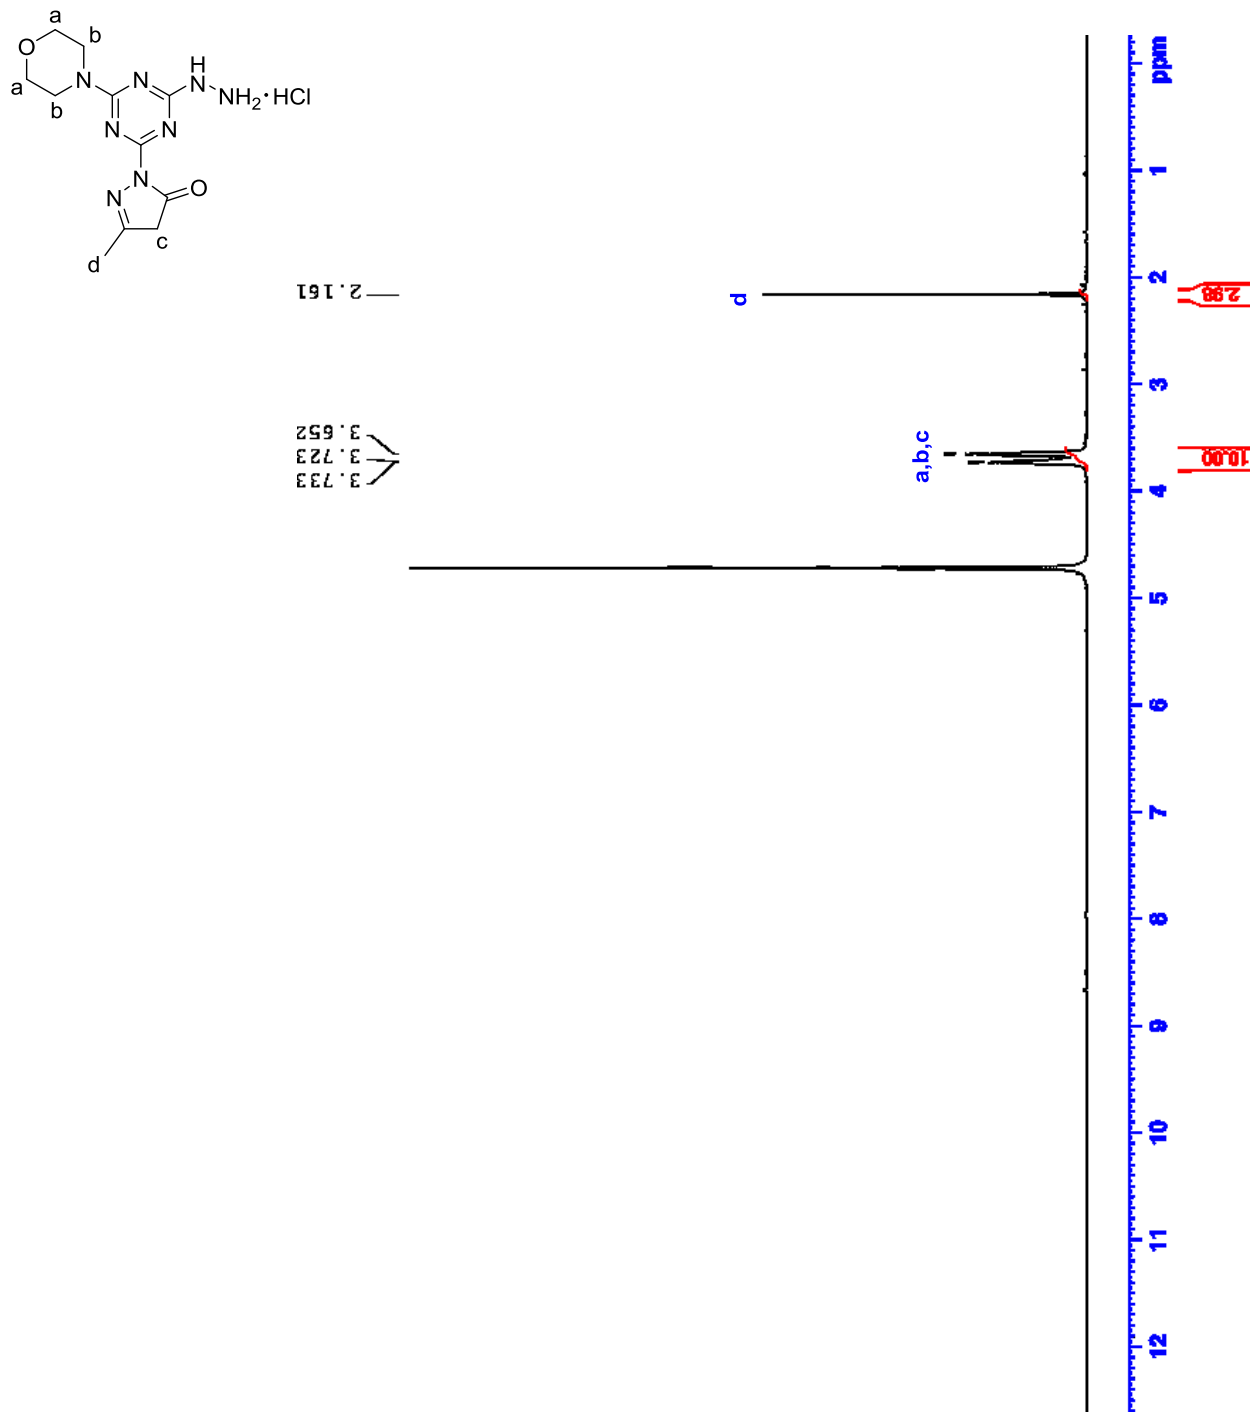

**Figure S15.**  $^1\text{H}$  NMR spectrum of molecule 1 in  $\text{D}_2\text{O}$ .

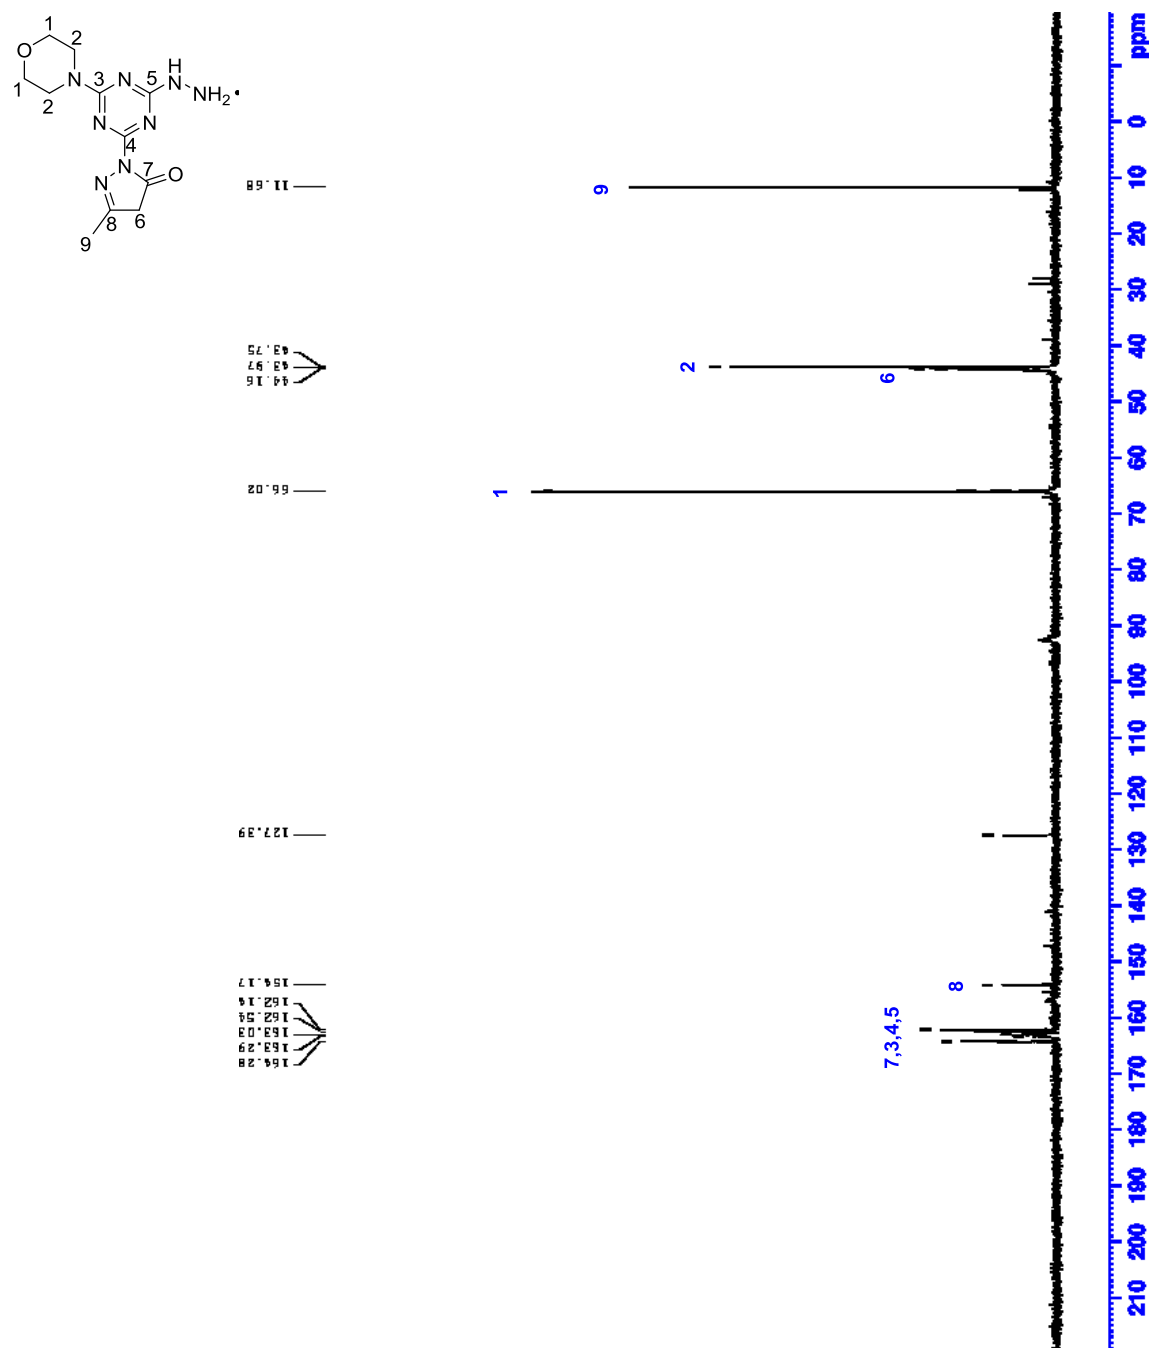

Figure S16.  $^{13}\text{C}$  NMR spectrum of molecule 1 in  $\text{D}_2\text{O}$ .

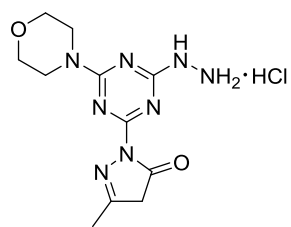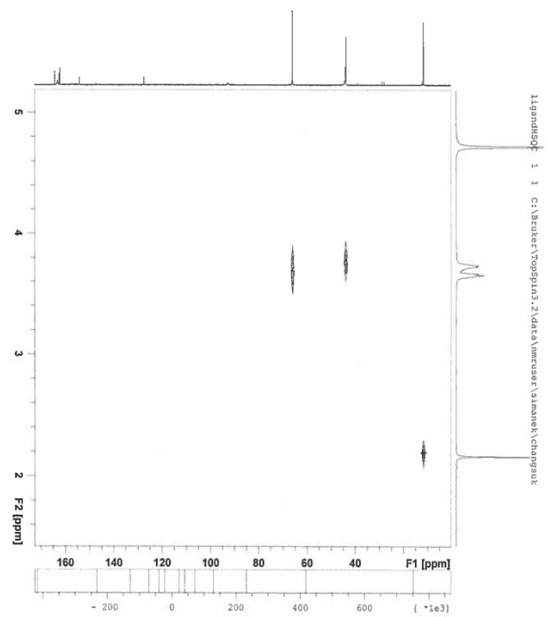

Figure S17. HSQC spectrum of molecule 1 in D<sub>2</sub>O.

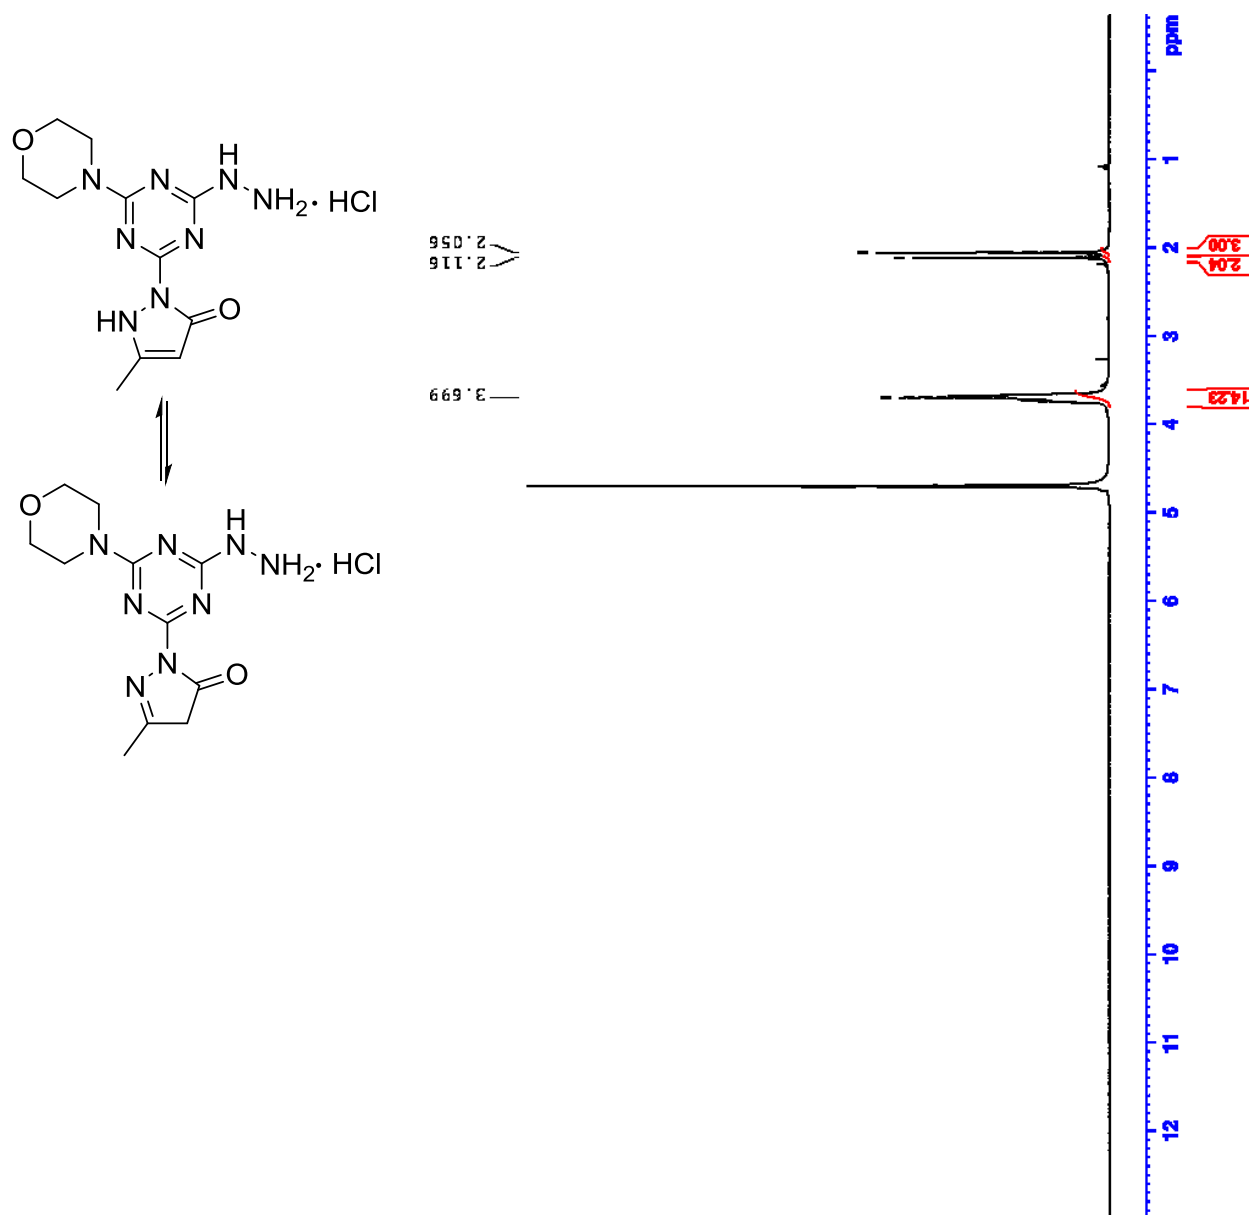

Figure S18.  $^1\text{H}$  NMR spectrum of molecule 1 in  $\text{D}_2\text{O}$  after 18 h.

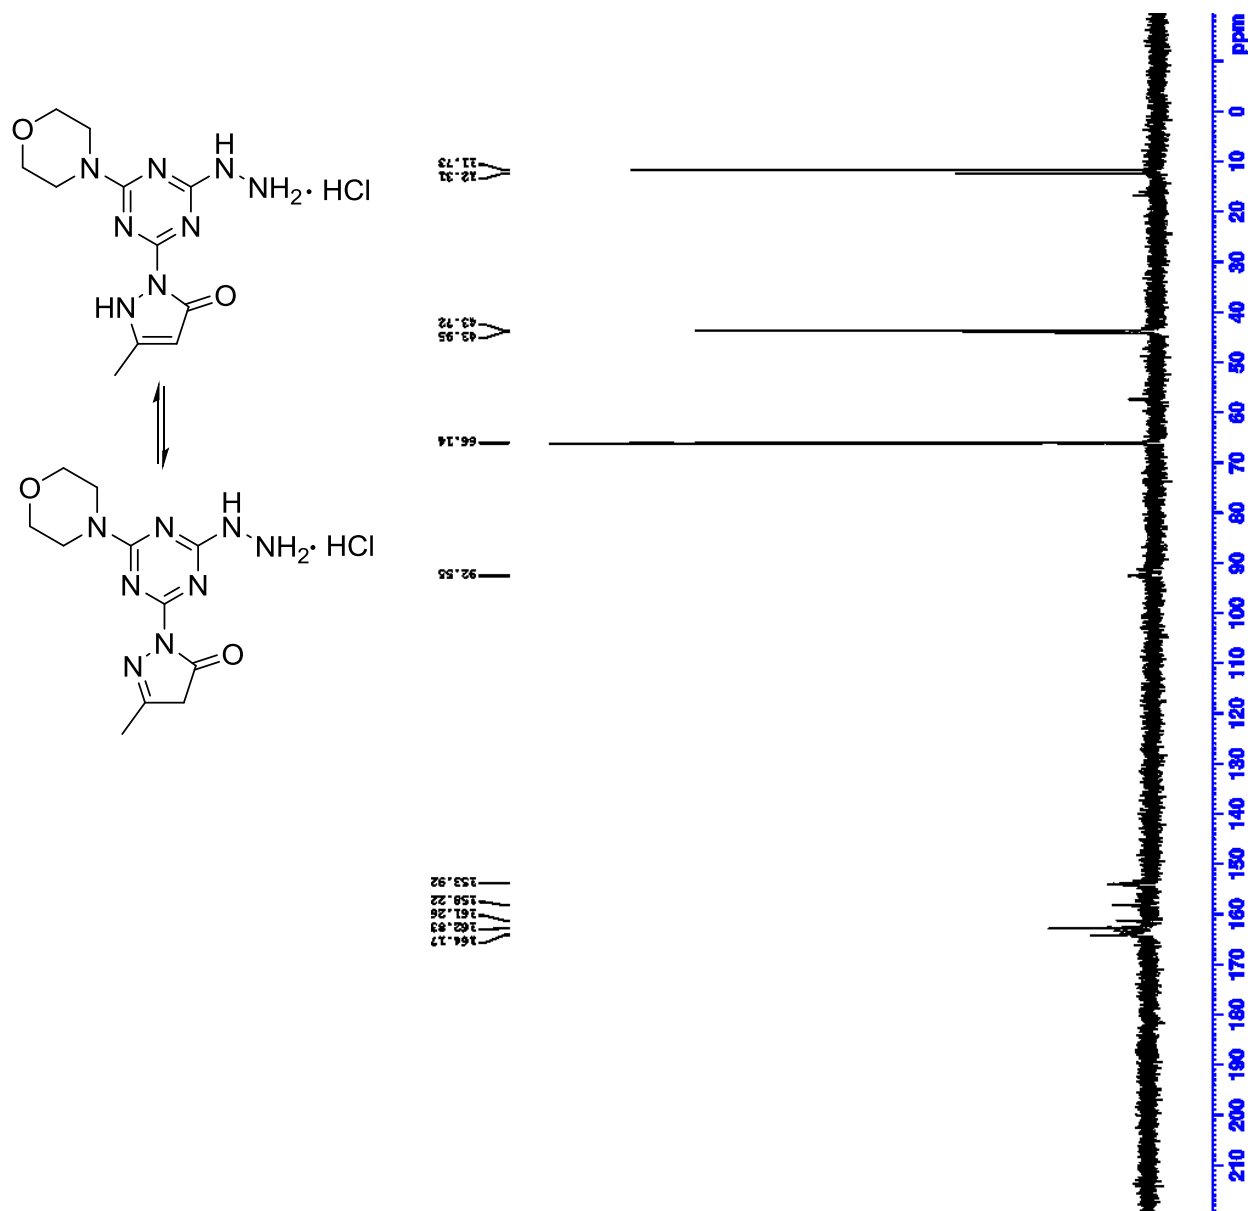

**Figure S19.**  $^{13}\text{C}$  NMR spectrum of molecule **1** in  $\text{D}_2\text{O}$  after 10 h.

|               |              |             |       |                 |              |                        |                       |
|---------------|--------------|-------------|-------|-----------------|--------------|------------------------|-----------------------|
| Sample Name   | ligandtest   | Position    | P1-A1 | Instrument Name | Instrument 1 | User Name              |                       |
| Inj Vol       | -1           | InjPosition |       | SampleType      | Sample       | IRM Calibration Status | All Ions Missed       |
| Data Filename | ligandtest.d | ACQ Method  |       | Comment         |              | Acquired Time          | 2/15/2017 10:30:53 AM |

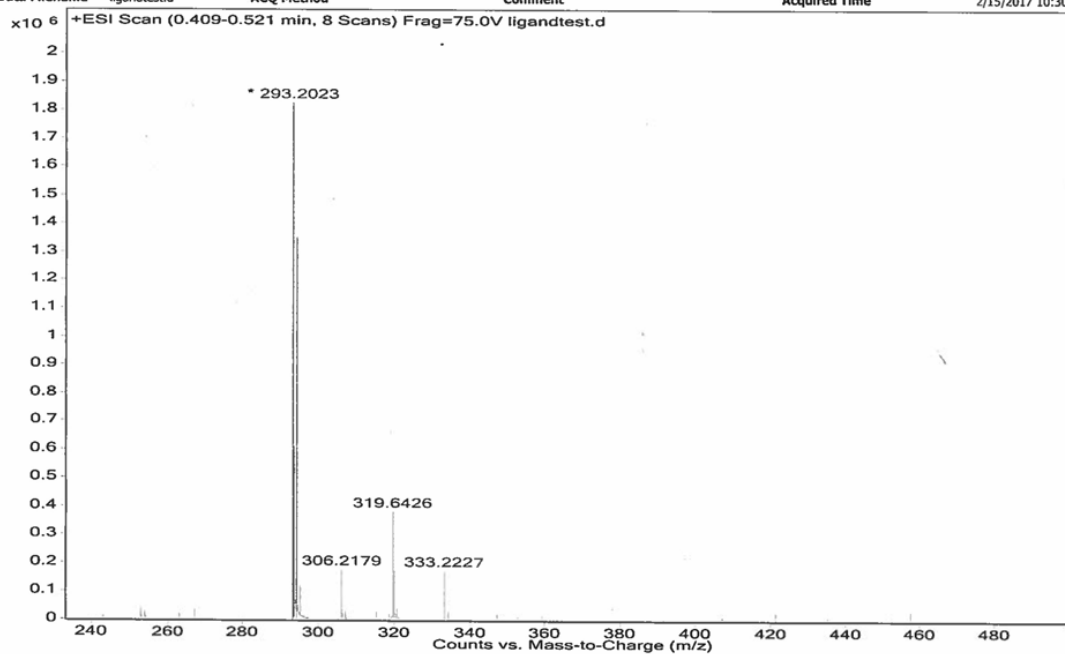

**Figure S20.** HR-MS spectrum of molecule **1**

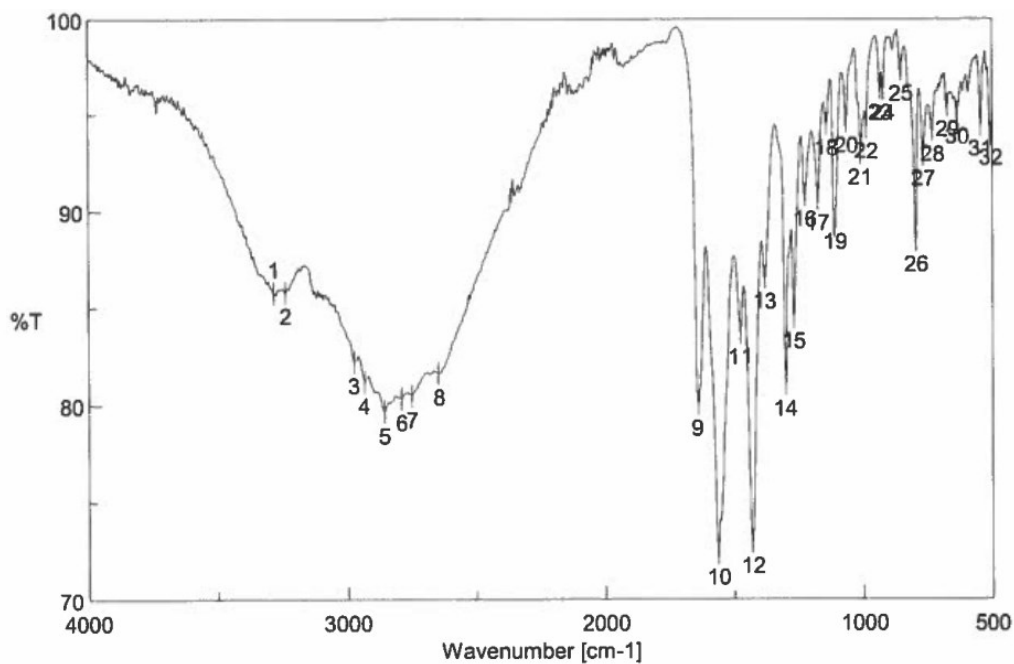

[ Result of Peak Picking ]

| No. | Position | Intensity | No. | Position | Intensity |
|-----|----------|-----------|-----|----------|-----------|
| 1   | 3281.29  | 85.7551   | 2   | 3236.93  | 85.7873   |
| 3   | 2974.66  | 82.2093   | 4   | 2934.16  | 81.1852   |
| 5   | 2857.99  | 79.6543   | 6   | 2790.49  | 80.3198   |
| 7   | 2749.99  | 80.4628   | 8   | 2646.82  | 81.6229   |
| 9   | 1638.23  | 80.0368   | 10  | 1562.06  | 72.3471   |
| 11  | 1474.31  | 83.7091   | 12  | 1430.92  | 72.9415   |
| 13  | 1379.82  | 86.5525   | 14  | 1300.75  | 81.0483   |
| 15  | 1268.93  | 84.5072   | 16  | 1223.61  | 90.8131   |
| 17  | 1174.44  | 90.6186   | 18  | 1141.65  | 94.4904   |
| 19  | 1106.94  | 89.648    | 20  | 1062.59  | 94.6217   |
| 21  | 1007.62  | 92.9836   | 22  | 985.447  | 94.3221   |
| 23  | 930.485  | 96.3326   | 24  | 918.914  | 96.2957   |
| 25  | 850.454  | 97.2907   | 26  | 793.564  | 88.4688   |
| 27  | 764.637  | 92.8997   | 28  | 728.961  | 94.1719   |
| 29  | 670.142  | 95.453    | 30  | 632.537  | 95.0699   |
| 31  | 543.828  | 94.4363   | 32  | 504.294  | 93.9651   |

Figure S21. IR spectrum of molecule 1



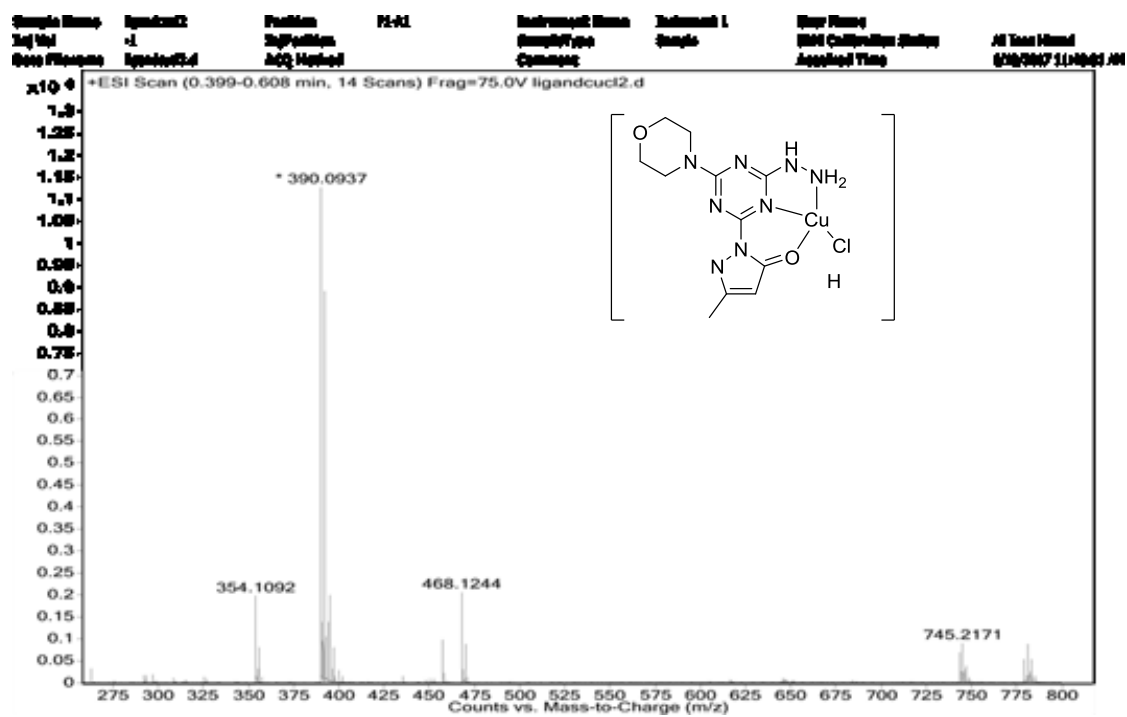

Figure S22. HR-MS spectrum of molecule 6.

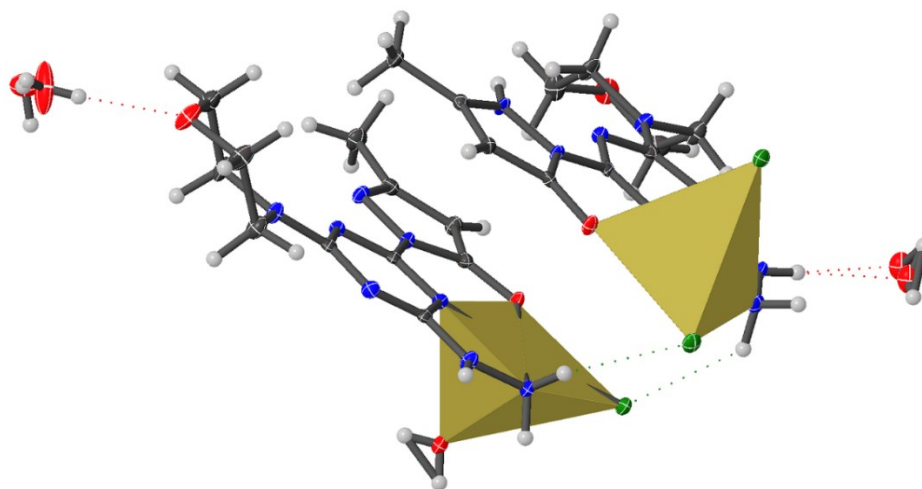

**Figure S23.** Molecular structure of molecule **6** in the solid state showing polyhedral at metal centers. One water molecule is not shown for clarity. Important intermolecular interactions are also highlighted.

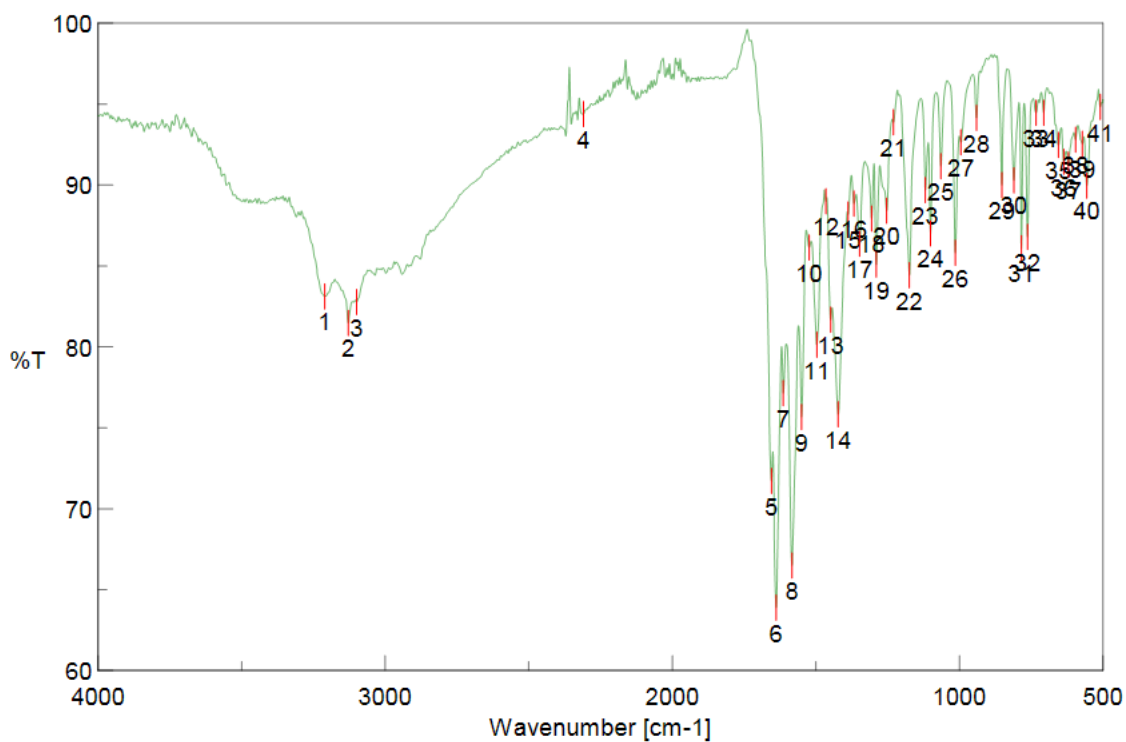

[ Result of Peak Picking ]

| No. | Position | Intensity | No. | Position | Intensity |
|-----|----------|-----------|-----|----------|-----------|
| 1   | 3210.9   | 83.1011   | 2   | 3128.94  | 81.4593   |
| 3   | 3100.01  | 82.7528   | 4   | 2309.34  | 94.3672   |
| 5   | 1654.62  | 71.7014   | 6   | 1638.23  | 63.8692   |
| 7   | 1613.16  | 77.137    | 8   | 1583.27  | 66.4837   |
| 9   | 1549.52  | 75.6659   | 10  | 1523.49  | 86.1289   |
| 11  | 1496.49  | 80.1218   | 12  | 1464.67  | 88.9813   |
| 13  | 1448.28  | 81.6685   | 14  | 1422.24  | 75.8206   |
| 15  | 1387.53  | 88.1591   | 16  | 1367.28  | 88.8438   |
| 17  | 1348     | 86.3666   | 18  | 1305.57  | 87.9027   |
| 19  | 1289.18  | 85.0627   | 20  | 1253.5   | 88.4072   |
| 21  | 1229.4   | 93.8612   | 22  | 1174.44  | 84.4109   |
| 23  | 1118.51  | 89.6799   | 24  | 1100.19  | 86.9966   |
| 25  | 1064.51  | 91.1438   | 26  | 1014.37  | 85.7977   |
| 27  | 995.089  | 92.6249   | 28  | 940.128  | 94.1459   |
| 29  | 852.382  | 89.9838   | 30  | 809.956  | 90.2858   |
| 31  | 783.922  | 86.0952   | 32  | 762.709  | 86.7845   |
| 33  | 732.817  | 94.4544   | 34  | 706.783  | 94.4431   |
| 35  | 654.715  | 92.454    | 36  | 636.394  | 91.427    |
| 37  | 620.002  | 91.2421   | 38  | 595.896  | 92.7882   |
| 39  | 571.79   | 92.5301   | 40  | 556.363  | 89.9547   |
| 41  | 509.115  | 94.816    |     |          |           |

Figure S24. IR spectrum of molecule 6.

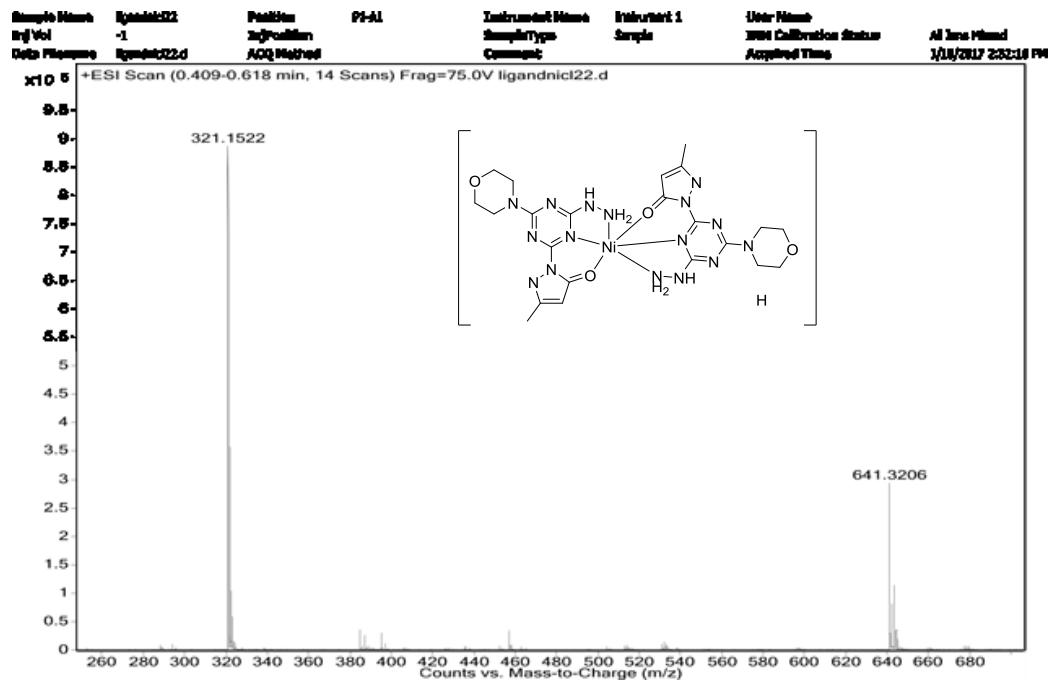

Figure S25. HR-MS spectrum of molecule 7.

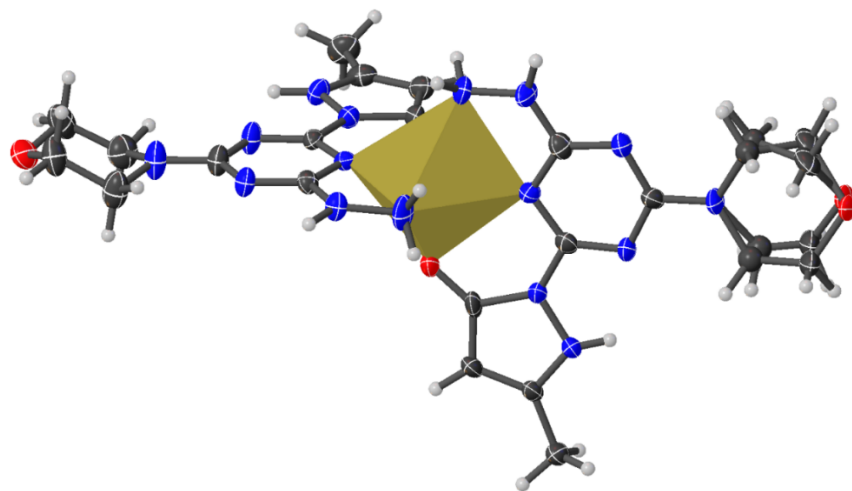

**Figure S26.** Molecular structure of **7** in the solid state showing distorted polyhedral at metal center. Solvent molecules and Cl<sup>-</sup> counter ions are not shown for clarity.

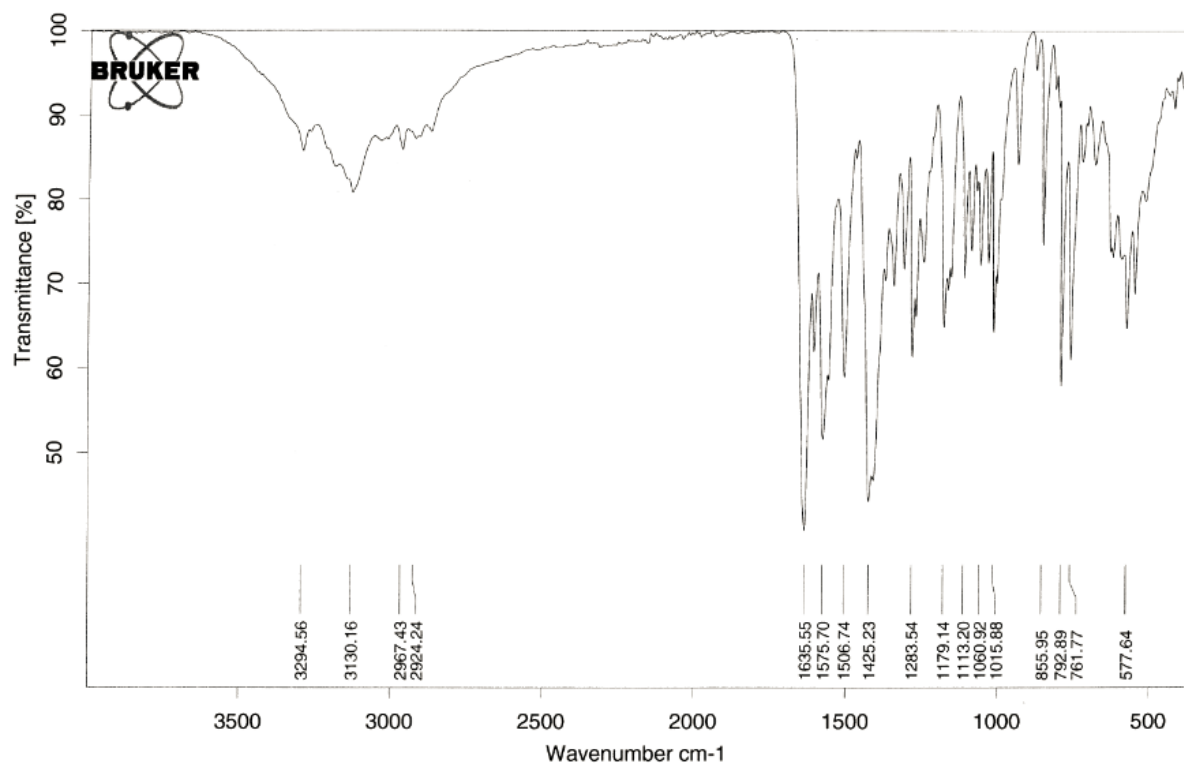

Figure S27. IR spectrum of molecule 7.

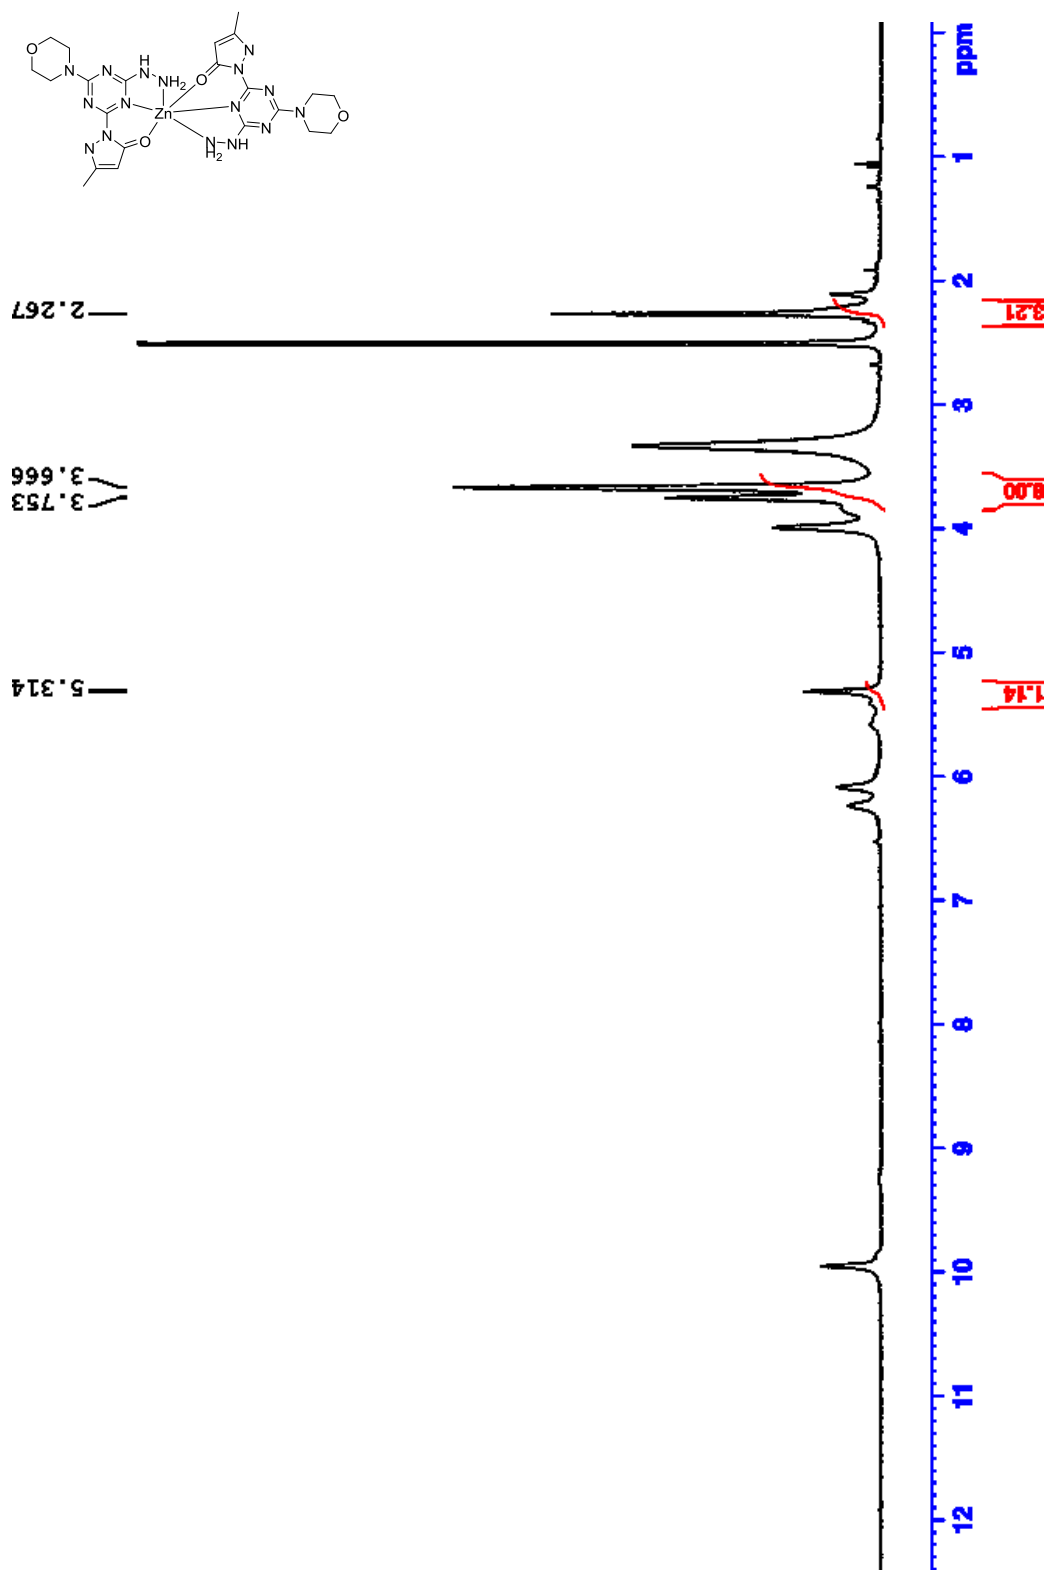

Figure S28.  $^1\text{H}$  NMR spectrum of molecule **8** in  $\text{DMSO-d}_6$ .

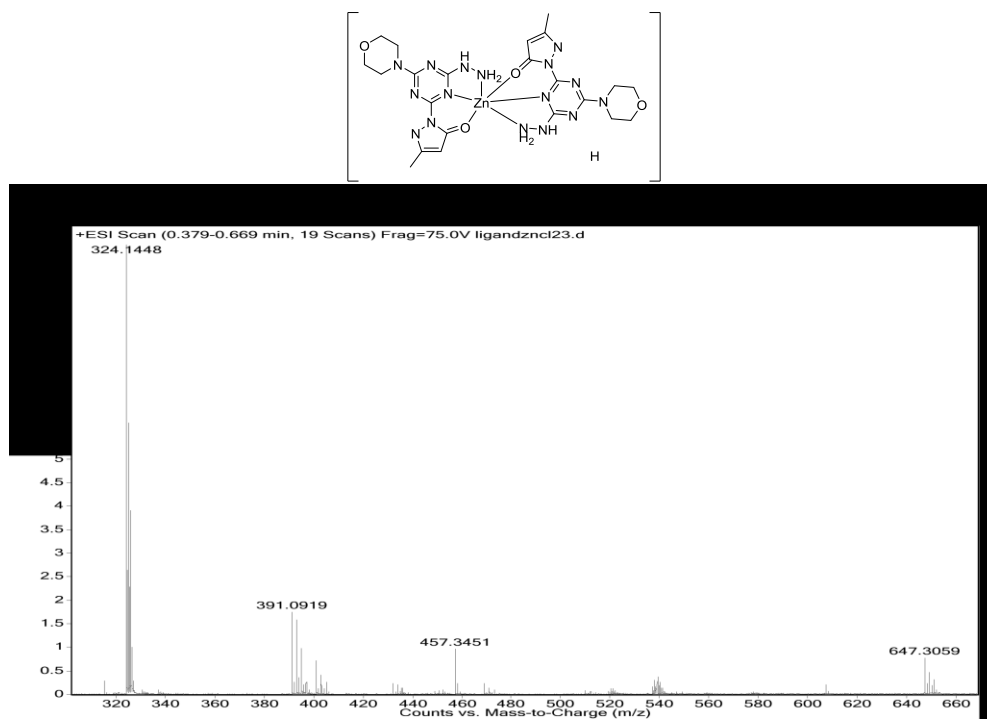

**Figure S29.** HR-MS spectrum of molecule **8**.



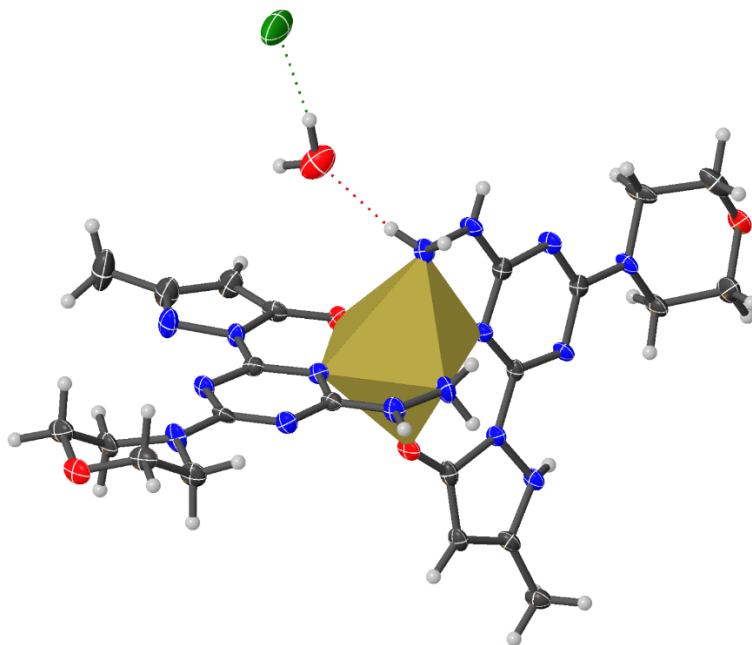

**Figure S30.** Molecular structure of **8** in the solid state showing distorted polyhedral at metal center. Eight solvent molecules are not shown for clarity. Bridged H-bonding interaction due to water molecule between main structural motif and counter Cl<sup>-</sup> ion is also highlighted.

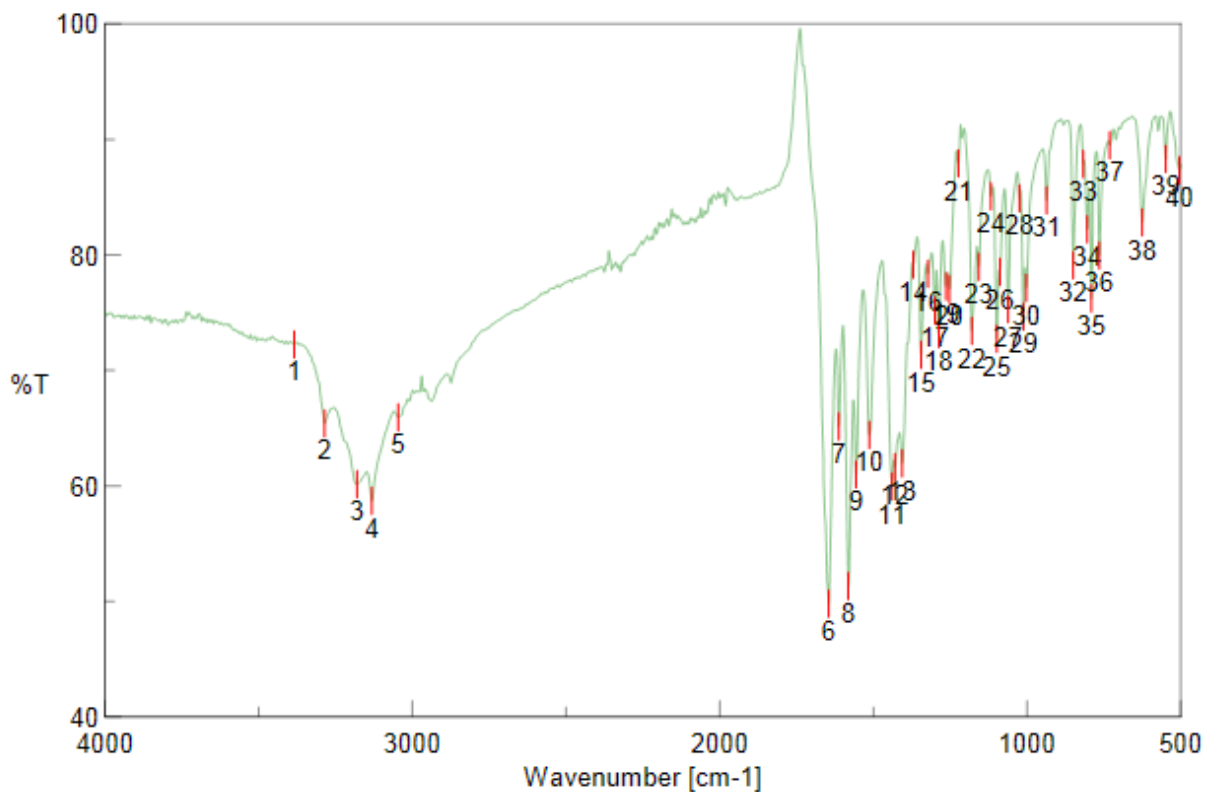

[ Result of Peak Picking ]

| No. | Position | Intensity | No. | Position | Intensity |
|-----|----------|-----------|-----|----------|-----------|
| 1   | 3384.46  | 72.2285   | 2   | 3285.14  | 65.4052   |
| 3   | 3180.04  | 60.1189   | 4   | 3131.83  | 58.6738   |
| 5   | 3046.01  | 65.9216   | 6   | 1644.98  | 49.785    |
| 7   | 1612.2   | 65.1177   | 8   | 1581.34  | 51.2941   |
| 9   | 1556.27  | 60.977    | 10  | 1512.88  | 64.3788   |
| 11  | 1439.6   | 59.8973   | 12  | 1429.96  | 61.6066   |
| 13  | 1405.85  | 61.9315   | 14  | 1370.18  | 79.1254   |
| 15  | 1345.11  | 71.3164   | 16  | 1321.96  | 78.3454   |
| 17  | 1299.79  | 75.183    | 18  | 1287.25  | 73.1171   |
| 19  | 1264.11  | 77.2374   | 20  | 1252.54  | 77.0248   |
| 21  | 1223.61  | 87.8935   | 22  | 1179.26  | 73.3932   |
| 23  | 1157.08  | 78.947    | 24  | 1117.55  | 85.049    |
| 25  | 1098.26  | 72.7288   | 26  | 1088.62  | 78.5126   |
| 27  | 1061.62  | 75.2963   | 28  | 1024.02  | 84.8797   |
| 29  | 1012.45  | 74.6221   | 30  | 1001.84  | 77.1253   |
| 31  | 936.271  | 84.6932   | 32  | 849.49   | 79.0745   |
| 33  | 816.706  | 87.837    | 34  | 804.171  | 82.1936   |
| 35  | 790.671  | 76.2043   | 36  | 764.637  | 79.9191   |
| 37  | 730.889  | 89.476    | 38  | 624.823  | 82.7911   |
| 39  | 548.649  | 88.296    | 40  | 504.294  | 87.3111   |

Figure S31. IR spectrum of molecule 8.

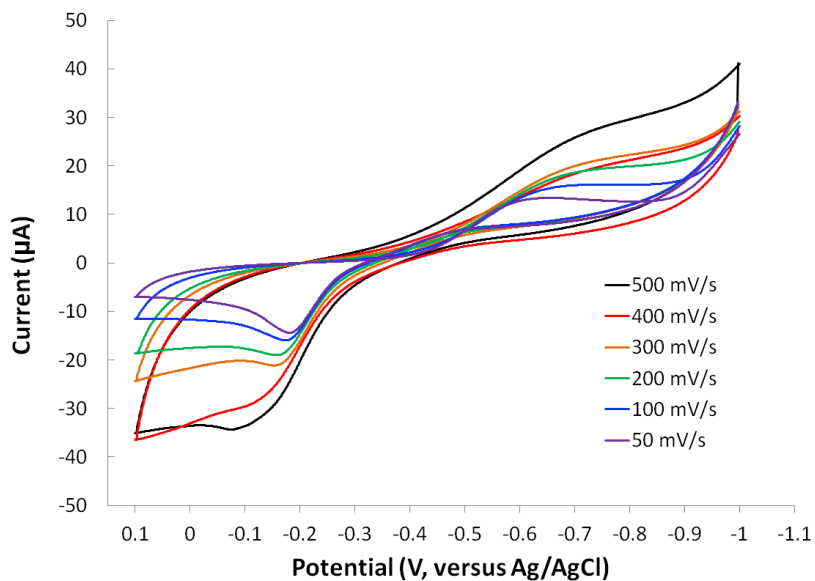

**Figure S32.** Cyclic voltammogram of complex **6** (3.3 mM) obtained in a 0.1 M KCl aqueous solution using a glassy carbon working electrode, platinum auxiliary electrode, and Ag/AgCl reference electrode at multiple scan rates.

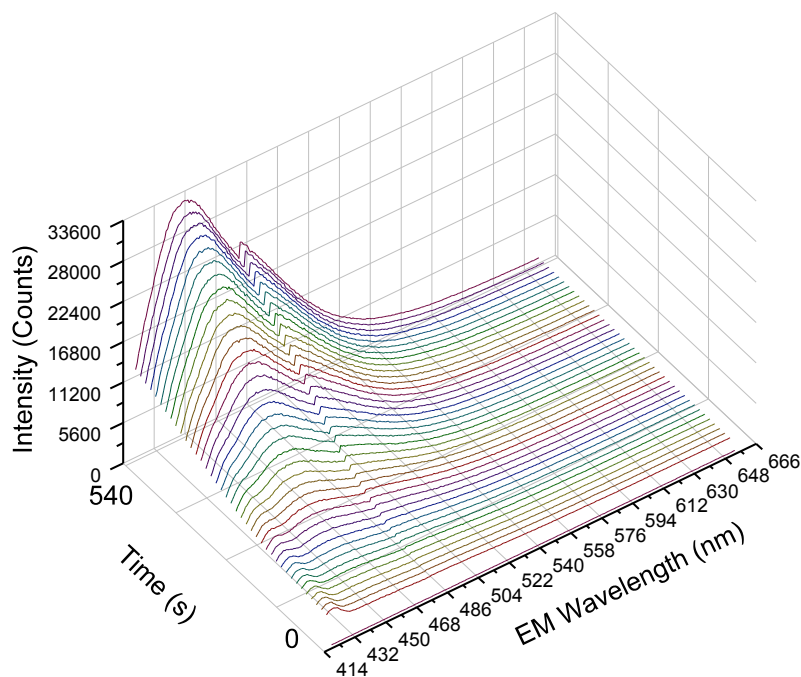

**Figure S33.** Fluorescence measured for CCA [500 μM] and ascorbate [300 μM] with Cu(II) [10 μM].

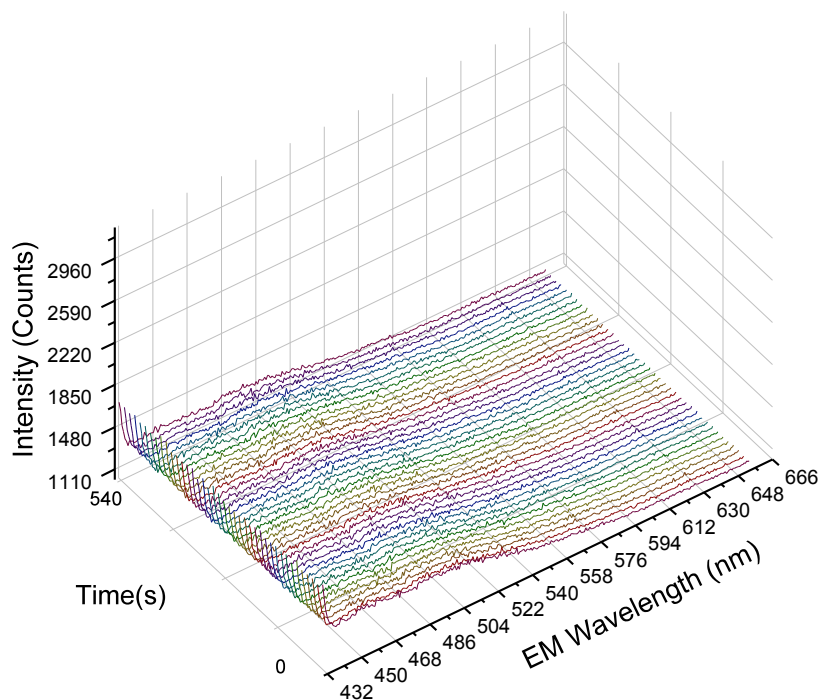

**Figure S34.** Fluorescence measured for CCA [500  $\mu\text{M}$ ] and ascorbate [300  $\mu\text{M}$ ] with Cu(II) [10  $\mu\text{M}$ ] and molecule **1** [10  $\mu\text{M}$ ].

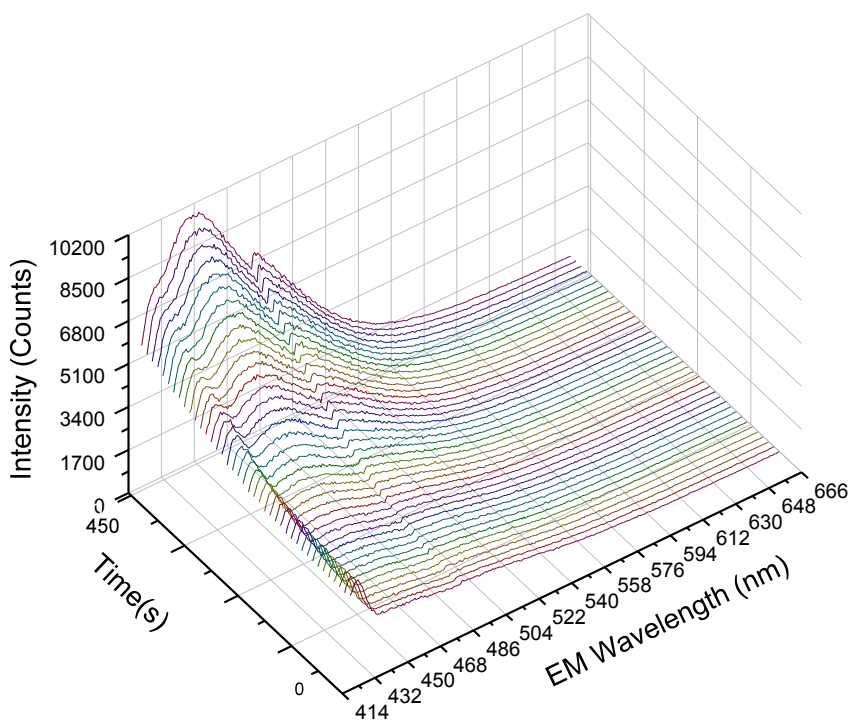

**Figure S35.** Fluorescence measured for CCA [500  $\mu\text{M}$ ] and ascorbate [300  $\mu\text{M}$ ] with Cu(II) [10  $\mu\text{M}$ ] and molecule **1** [5  $\mu\text{M}$ ].

**Table S2.** Geometric parameters *i.e.* bond lengths and angles (Å, °) for **6**.

| <i>Bond lengths</i> |            |          |             |
|---------------------|------------|----------|-------------|
| O8A—H8AA            | 0.87 (5)   | Cu2—Cl2  | 2.2778 (7)  |
| O8A—H8AB            | 1.12 (5)   | Cu2—Cl3  | 2.5706 (8)  |
| O8B—H8AA            | 0.70 (5)   | Cu2—O5   | 1.9418 (19) |
| O8B—H8AB            | 0.57 (5)   | Cu2—N11  | 1.962 (2)   |
| Cu1—Cl1             | 2.2767 (7) | Cu2—N14  | 2.013 (2)   |
| Cu1—O2              | 1.910 (2)  | O4—C12   | 1.424 (4)   |
| Cu1—O3              | 2.306 (2)  | O4—C13   | 1.429 (4)   |
| Cu1—N4              | 1.953 (2)  | O5—C19   | 1.272 (3)   |
| Cu1—N6              | 2.018 (2)  | N9—C14   | 1.468 (3)   |
| O1—C1               | 1.430 (4)  | N9—C15   | 1.466 (4)   |
| O1—C3               | 1.429 (4)  | N9—C16   | 1.328 (4)   |
| O2—C8               | 1.294 (3)  | N10—C16  | 1.355 (3)   |
| O3—H3A              | 0.69 (4)   | N10—C17  | 1.327 (4)   |
| O3—H3B              | 0.71 (5)   | N11—C17  | 1.359 (4)   |
| N1—C2               | 1.459 (4)  | N11—C18  | 1.337 (3)   |
| N1—C4               | 1.465 (4)  | N12—C16  | 1.369 (4)   |
| N1—C5               | 1.341 (4)  | N12—C18  | 1.301 (4)   |
| N2—C5               | 1.348 (4)  | N13—H13  | 0.83 (3)    |
| N2—C7               | 1.324 (4)  | N13—N14  | 1.418 (3)   |
| N3—C5               | 1.361 (4)  | N13—C17  | 1.341 (3)   |
| N3—C6               | 1.315 (4)  | N14—H14A | 0.86 (4)    |
| N4—C6               | 1.345 (3)  | N14—H14B | 0.88 (4)    |
| N4—C7               | 1.354 (4)  | N15—N16  | 1.380 (3)   |
| N5—H5               | 0.79 (3)   | N15—C18  | 1.393 (4)   |
| N5—N6               | 1.421 (3)  | N15—C19  | 1.399 (3)   |
| N5—C7               | 1.341 (4)  | N16—C21  | 1.338 (4)   |
| N6—H6A              | 0.85 (4)   | N16—H16  | 0.82 (4)    |
| N6—H6B              | 0.92 (4)   | C12—H12A | 0.9900      |
| N7—N8               | 1.398 (3)  | C12—H12B | 0.9900      |
| N7—C6               | 1.376 (4)  | C12—C14  | 1.511 (4)   |
| N7—C8               | 1.408 (4)  | C13—H13A | 0.9900      |
| N8—C10              | 1.319 (4)  | C13—H13B | 0.9900      |
| C1—H1A              | 0.9900     | C13—C15  | 1.518 (4)   |

|                    |             |                      |             |
|--------------------|-------------|----------------------|-------------|
| C1—H1B             | 0.9900      | C14—H14C             | 0.9900      |
| C1—C2              | 1.521 (4)   | C14—H14D             | 0.9900      |
| C2—H2A             | 0.9900      | C15—H15A             | 0.9900      |
| C2—H2B             | 0.9900      | C15—H15B             | 0.9900      |
| C3—H3C             | 0.9900      | C19—C20              | 1.404 (4)   |
| C3—H3D             | 0.9900      | C20—H20              | 0.9500      |
| C3—C4              | 1.512 (4)   | C20—C21              | 1.378 (4)   |
| C4—H4A             | 0.9900      | C21—C22              | 1.488 (4)   |
| C4—H4B             | 0.9900      | C22—H22A             | 0.9800      |
| C8—C9              | 1.374 (4)   | C22—H22B             | 0.9800      |
| C9—H9              | 0.9500      | C22—H22C             | 0.9800      |
| C9—C10             | 1.407 (4)   | O6—H6C               | 0.78 (4)    |
| C10—C11            | 1.489 (4)   | O6—H6D               | 0.68 (5)    |
| C11—H11A           | 0.9800      | O7—H7A               | 0.76 (5)    |
| C11—H11B           | 0.9800      | O7—H7B               | 0.72 (5)    |
| C11—H11C           | 0.9800      | O10—O10 <sup>i</sup> | 1.646 (16)  |
| <i>Bond angles</i> |             |                      |             |
| H8AA—O8A—H8AB      | 60 (4)      | Cl2—Cu2—Cl3          | 103.37 (3)  |
| H8AA—O8B—H8AB      | 106 (7)     | O5—Cu2—Cl2           | 92.52 (6)   |
| Cl1—Cu1—O3         | 100.94 (7)  | O5—Cu2—Cl3           | 99.27 (6)   |
| O2—Cu1—Cl1         | 90.43 (6)   | O5—Cu2—N11           | 90.89 (9)   |
| O2—Cu1—O3          | 100.56 (9)  | O5—Cu2—N14           | 166.34 (9)  |
| O2—Cu1—N4          | 91.94 (9)   | N11—Cu2—Cl2          | 161.34 (7)  |
| O2—Cu1—N6          | 166.42 (10) | N11—Cu2—Cl3          | 94.16 (7)   |
| N4—Cu1—Cl1         | 170.32 (7)  | N11—Cu2—N14          | 80.60 (10)  |
| N4—Cu1—O3          | 87.85 (9)   | N14—Cu2—Cl2          | 92.30 (7)   |
| N4—Cu1—N6          | 81.45 (10)  | N14—Cu2—Cl3          | 92.03 (8)   |
| N6—Cu1—Cl1         | 94.23 (7)   | C12—O4—C13           | 110.3 (2)   |
| N6—Cu1—O3          | 91.09 (9)   | C19—O5—Cu2           | 126.25 (18) |
| C3—O1—C1           | 110.9 (2)   | C15—N9—C14           | 113.9 (2)   |
| C8—O2—Cu1          | 125.16 (18) | C16—N9—C14           | 122.5 (2)   |
| Cu1—O3—H3A         | 115 (3)     | C16—N9—C15           | 123.1 (2)   |
| Cu1—O3—H3B         | 136 (4)     | C17—N10—C16          | 114.6 (2)   |
| H3A—O3—H3B         | 103 (5)     | C17—N11—Cu2          | 115.50 (17) |
| C2—N1—C4           | 113.6 (2)   | C18—N11—Cu2          | 130.81 (19) |

|            |             |               |             |
|------------|-------------|---------------|-------------|
| C5—N1—C2   | 122.6 (2)   | C18—N11—C17   | 113.0 (2)   |
| C5—N1—C4   | 123.1 (2)   | C18—N12—C16   | 113.9 (2)   |
| C7—N2—C5   | 114.0 (2)   | N14—N13—H13   | 119 (2)     |
| C6—N3—C5   | 114.4 (2)   | C17—N13—H13   | 122 (2)     |
| C6—N4—Cu1  | 129.78 (19) | C17—N13—N14   | 117.3 (2)   |
| C6—N4—C7   | 114.4 (2)   | Cu2—N14—H14A  | 116 (2)     |
| C7—N4—Cu1  | 115.40 (18) | Cu2—N14—H14B  | 106 (3)     |
| N6—N5—H5   | 116 (2)     | N13—N14—Cu2   | 110.25 (17) |
| C7—N5—H5   | 126 (2)     | N13—N14—H14A  | 109 (2)     |
| C7—N5—N6   | 118.1 (2)   | N13—N14—H14B  | 107 (3)     |
| Cu1—N6—H6A | 113 (2)     | H14A—N14—H14B | 108 (3)     |
| Cu1—N6—H6B | 109 (2)     | N16—N15—C18   | 120.2 (2)   |
| N5—N6—Cu1  | 109.22 (17) | N16—N15—C19   | 108.5 (2)   |
| N5—N6—H6A  | 105 (2)     | C18—N15—C19   | 131.3 (2)   |
| N5—N6—H6B  | 109 (2)     | N15—N16—H16   | 124 (3)     |
| H6A—N6—H6B | 111 (3)     | C21—N16—N15   | 108.6 (2)   |
| N8—N7—C8   | 110.9 (2)   | C21—N16—H16   | 127 (3)     |
| C6—N7—N8   | 119.1 (2)   | O4—C12—H12A   | 109.4       |
| C6—N7—C8   | 129.9 (2)   | O4—C12—H12B   | 109.4       |
| C10—N8—N7  | 104.2 (2)   | O4—C12—C14    | 111.2 (2)   |
| O1—C1—H1A  | 109.2       | H12A—C12—H12B | 108.0       |
| O1—C1—H1B  | 109.2       | C14—C12—H12A  | 109.4       |
| O1—C1—C2   | 112.1 (2)   | C14—C12—H12B  | 109.4       |
| H1A—C1—H1B | 107.9       | O4—C13—H13A   | 109.3       |
| C2—C1—H1A  | 109.2       | O4—C13—H13B   | 109.3       |
| C2—C1—H1B  | 109.2       | O4—C13—C15    | 111.6 (2)   |
| N1—C2—C1   | 109.0 (2)   | H13A—C13—H13B | 108.0       |
| N1—C2—H2A  | 109.9       | C15—C13—H13A  | 109.3       |
| N1—C2—H2B  | 109.9       | C15—C13—H13B  | 109.3       |
| C1—C2—H2A  | 109.9       | N9—C14—C12    | 109.4 (2)   |
| C1—C2—H2B  | 109.9       | N9—C14—H14C   | 109.8       |
| H2A—C2—H2B | 108.3       | N9—C14—H14D   | 109.8       |
| O1—C3—H3C  | 109.5       | C12—C14—H14C  | 109.8       |
| O1—C3—H3D  | 109.5       | C12—C14—H14D  | 109.8       |
| O1—C3—C4   | 110.7 (2)   | H14C—C14—H14D | 108.2       |

|               |           |               |           |
|---------------|-----------|---------------|-----------|
| H3C—C3—H3D    | 108.1     | N9—C15—C13    | 109.3 (2) |
| C4—C3—H3C     | 109.5     | N9—C15—H15A   | 109.8     |
| C4—C3—H3D     | 109.5     | N9—C15—H15B   | 109.8     |
| N1—C4—C3      | 109.4 (2) | C13—C15—H15A  | 109.8     |
| N1—C4—H4A     | 109.8     | C13—C15—H15B  | 109.8     |
| N1—C4—H4B     | 109.8     | H15A—C15—H15B | 108.3     |
| C3—C4—H4A     | 109.8     | N9—C16—N10    | 118.9 (2) |
| C3—C4—H4B     | 109.8     | N9—C16—N12    | 116.7 (2) |
| H4A—C4—H4B    | 108.2     | N10—C16—N12   | 124.4 (2) |
| N1—C5—N2      | 118.5 (2) | N10—C17—N11   | 125.8 (2) |
| N1—C5—N3      | 116.0 (2) | N10—C17—N13   | 119.0 (2) |
| N2—C5—N3      | 125.5 (3) | N13—C17—N11   | 115.2 (2) |
| N3—C6—N4      | 125.7 (3) | N11—C18—N15   | 115.5 (2) |
| N3—C6—N7      | 117.6 (2) | N12—C18—N11   | 128.2 (3) |
| N4—C6—N7      | 116.6 (2) | N12—C18—N15   | 116.3 (2) |
| N2—C7—N4      | 125.8 (2) | O5—C19—N15    | 123.8 (2) |
| N2—C7—N5      | 118.7 (3) | O5—C19—C20    | 130.6 (3) |
| N5—C7—N4      | 115.4 (2) | N15—C19—C20   | 105.6 (2) |
| O2—C8—N7      | 124.7 (2) | C19—C20—H20   | 126.0     |
| O2—C8—C9      | 129.7 (3) | C21—C20—C19   | 108.1 (2) |
| C9—C8—N7      | 105.6 (2) | C21—C20—H20   | 126.0     |
| C8—C9—H9      | 126.9     | N16—C21—C20   | 109.2 (2) |
| C8—C9—C10     | 106.2 (3) | N16—C21—C22   | 120.4 (2) |
| C10—C9—H9     | 126.9     | C20—C21—C22   | 130.3 (3) |
| N8—C10—C9     | 113.1 (2) | C21—C22—H22A  | 109.5     |
| N8—C10—C11    | 119.9 (3) | C21—C22—H22B  | 109.5     |
| C9—C10—C11    | 127.0 (3) | C21—C22—H22C  | 109.5     |
| C10—C11—H11A  | 109.5     | H22A—C22—H22B | 109.5     |
| C10—C11—H11B  | 109.5     | H22A—C22—H22C | 109.5     |
| C10—C11—H11C  | 109.5     | H22B—C22—H22C | 109.5     |
| H11A—C11—H11B | 109.5     | H6C—O6—H6D    | 109 (5)   |
| H11A—C11—H11C | 109.5     | H7A—O7—H7B    | 101 (5)   |
| H11B—C11—H11C | 109.5     |               |           |

Symmetry code: (i)  $-x, -y, -z+2$ .



**Table S3.** Geometric parameters *i.e.* bond lengths and angles (Å, °) for **7**.

| <i>Bond lengths</i>  |            |         |            |
|----------------------|------------|---------|------------|
| O6A—O6A <sup>i</sup> | 1.16 (19)  | N8—H8B  | 0.9100     |
| C19A—C20A            | 1.42 (6)   | N9—H9A  | 0.9100     |
| C19A—N14             | 1.49 (6)   | N9—H9B  | 0.9100     |
| C20A—O4A             | 1.44 (3)   | N9—N10  | 1.413 (9)  |
| C21A—C22A            | 1.46 (2)   | N10—C17 | 1.348 (11) |
| C21A—N14             | 1.478 (16) | N10—H10 | 0.89 (9)   |
| C22A—O4A             | 1.68 (3)   | N11—C16 | 1.344 (10) |
| O6B—O6B <sup>i</sup> | 1.7 (2)    | N11—C17 | 1.347 (10) |
| C19B—C20B            | 1.05 (6)   | N12—C17 | 1.323 (10) |
| C19B—N14             | 1.49 (8)   | N12—C18 | 1.348 (10) |
| C20B—O4B             | 1.45 (3)   | N13—C16 | 1.307 (9)  |
| C21B—C22B            | 1.59 (3)   | N13—C18 | 1.362 (10) |
| C21B—N14             | 1.539 (19) | N14—C18 | 1.340 (10) |
| C22B—O4B             | 1.66 (4)   | N15—N16 | 1.376 (9)  |
| Ni—O2                | 2.053 (5)  | N15—C12 | 1.416 (9)  |
| Ni—O3                | 2.034 (6)  | N15—C16 | 1.398 (10) |
| Ni—N4                | 2.018 (6)  | N16—C14 | 1.337 (10) |
| Ni—N8                | 2.096 (7)  | N16—H16 | 0.79 (8)   |
| Ni—N9                | 2.092 (7)  | C1—H1A  | 0.9900     |
| Ni—N11               | 2.000 (6)  | C1—H1B  | 0.9900     |
| O1—C1                | 1.423 (11) | C1—C3   | 1.473 (13) |
| O1—C2                | 1.405 (11) | C2—H2A  | 0.9900     |
| O2—C11               | 1.262 (9)  | C2—H2B  | 0.9900     |
| O3—C12               | 1.247 (9)  | C2—C4   | 1.440 (14) |
| N1—C3                | 1.495 (11) | C3—H3A  | 0.9900     |
| N1—C4                | 1.467 (11) | C3—H3B  | 0.9900     |
| N1—C5                | 1.332 (10) | C4—H4A  | 0.9900     |
| N2—C5                | 1.333 (10) | C4—H4B  | 0.9900     |
| N2—C6                | 1.326 (9)  | C8—H8C  | 0.9800     |
| N3—C5                | 1.372 (10) | C8—H8D  | 0.9800     |
| N3—C7                | 1.313 (9)  | C8—H8E  | 0.9800     |
| N4—C6                | 1.356 (9)  | C8—C9   | 1.489 (12) |
| N4—C7                | 1.324 (9)  | C9—C10  | 1.372 (12) |

|                    |            |             |            |
|--------------------|------------|-------------|------------|
| N5—N6              | 1.374 (9)  | C10—H10A    | 0.9500     |
| N5—C9              | 1.333 (11) | C10—C11     | 1.400 (11) |
| N5—H5              | 0.94 (9)   | C12—C13     | 1.406 (12) |
| N6—C7              | 1.401 (10) | C13—H13     | 0.9500     |
| N6—C11             | 1.417 (9)  | C13—C14     | 1.378 (11) |
| N7—N8              | 1.417 (9)  | C14—C15     | 1.482 (11) |
| N7—C6              | 1.321 (10) | C15—H15A    | 0.9800     |
| N7—H7              | 0.93 (8)   | C15—H15B    | 0.9800     |
| N8—H8A             | 0.9100     | C15—H15C    | 0.9800     |
| <i>Bond angles</i> |            |             |            |
| C20A—C19A—N14      | 114 (4)    | C14—N16—N15 | 108.7 (6)  |
| C19A—C20A—O4A      | 123 (2)    | C14—N16—H16 | 136 (6)    |
| C22A—C21A—N14      | 106.2 (13) | O1—C1—H1A   | 109.4      |
| C21A—C22A—O4A      | 102.0 (16) | O1—C1—H1B   | 109.4      |
| C20A—O4A—C22A      | 111.8 (14) | O1—C1—C3    | 111.3 (8)  |
| C20B—C19B—N14      | 131 (6)    | H1A—C1—H1B  | 108.0      |
| C19B—C20B—O4B      | 117 (5)    | C3—C1—H1A   | 109.4      |
| N14—C21B—C22B      | 103.2 (14) | C3—C1—H1B   | 109.4      |
| C21B—C22B—O4B      | 89.6 (16)  | O1—C2—H2A   | 109.1      |
| C20B—O4B—C22B      | 118.0 (19) | O1—C2—H2B   | 109.1      |
| O2—Ni—N8           | 169.4 (2)  | O1—C2—C4    | 112.5 (8)  |
| O2—Ni—N9           | 90.1 (2)   | H2A—C2—H2B  | 107.8      |
| O3—Ni—O2           | 91.3 (2)   | C4—C2—H2A   | 109.1      |
| O3—Ni—N8           | 88.9 (3)   | C4—C2—H2B   | 109.1      |
| O3—Ni—N9           | 170.1 (2)  | N1—C3—H3A   | 109.8      |
| N4—Ni—O2           | 89.4 (2)   | N1—C3—H3B   | 109.8      |
| N4—Ni—O3           | 91.0 (2)   | C1—C3—N1    | 109.3 (8)  |
| N4—Ni—N8           | 80.0 (2)   | C1—C3—H3A   | 109.8      |
| N4—Ni—N9           | 98.9 (2)   | C1—C3—H3B   | 109.8      |
| N9—Ni—N8           | 91.5 (3)   | H3A—C3—H3B  | 108.3      |
| N11—Ni—O2          | 93.4 (2)   | N1—C4—H4A   | 109.5      |
| N11—Ni—O3          | 90.0 (2)   | N1—C4—H4B   | 109.5      |
| N11—Ni—N4          | 177.0 (3)  | C2—C4—N1    | 110.9 (8)  |
| N11—Ni—N8          | 97.1 (3)   | C2—C4—H4A   | 109.5      |
| N11—Ni—N9          | 80.1 (2)   | C2—C4—H4B   | 109.4      |

---

|             |           |              |           |
|-------------|-----------|--------------|-----------|
| C2—O1—C1    | 111.1 (7) | H4A—C4—H4B   | 108.0     |
| C11—O2—Ni   | 126.4 (5) | N1—C5—N2     | 118.1 (7) |
| C12—O3—Ni   | 125.8 (5) | N1—C5—N3     | 117.4 (7) |
| C4—N1—C3    | 113.4 (7) | N2—C5—N3     | 124.6 (7) |
| C5—N1—C3    | 121.6 (7) | N2—C6—N4     | 124.5 (7) |
| C5—N1—C4    | 121.7 (7) | N7—C6—N2     | 117.7 (7) |
| C6—N2—C5    | 115.7 (7) | N7—C6—N4     | 117.7 (6) |
| C7—N3—C5    | 113.5 (6) | N3—C7—N4     | 127.4 (7) |
| C6—N4—Ni    | 114.2 (5) | N3—C7—N6     | 115.6 (6) |
| C7—N4—Ni    | 131.1 (5) | N4—C7—N6     | 116.9 (6) |
| C7—N4—C6    | 114.3 (6) | H8C—C8—H8D   | 109.5     |
| N6—N5—H5    | 121 (5)   | H8C—C8—H8E   | 109.5     |
| C9—N5—N6    | 108.6 (6) | H8D—C8—H8E   | 109.5     |
| C9—N5—H5    | 131 (5)   | C9—C8—H8C    | 109.5     |
| N5—N6—C7    | 119.7 (6) | C9—C8—H8D    | 109.5     |
| N5—N6—C11   | 108.1 (6) | C9—C8—H8E    | 109.5     |
| C7—N6—C11   | 132.2 (6) | N5—C9—C8     | 121.4 (8) |
| N8—N7—H7    | 124 (5)   | N5—C9—C10    | 110.1 (7) |
| C6—N7—N8    | 119.2 (6) | C10—C9—C8    | 128.5 (8) |
| C6—N7—H7    | 117 (5)   | C9—C10—H10A  | 126.1     |
| Ni—N8—H8A   | 110.0     | C9—C10—C11   | 107.8 (7) |
| Ni—N8—H8B   | 110.0     | C11—C10—H10A | 126.1     |
| N7—N8—Ni    | 108.7 (5) | O2—C11—N6    | 123.7 (7) |
| N7—N8—H8A   | 110.0     | O2—C11—C10   | 130.8 (7) |
| N7—N8—H8B   | 110.0     | C10—C11—N6   | 105.5 (6) |
| H8A—N8—H8B  | 108.3     | O3—C12—N15   | 124.8 (7) |
| Ni—N9—H9A   | 110.1     | O3—C12—C13   | 130.0 (7) |
| Ni—N9—H9B   | 110.1     | C13—C12—N15  | 105.2 (6) |
| H9A—N9—H9B  | 108.4     | C12—C13—H13  | 126.0     |
| N10—N9—Ni   | 108.2 (5) | C14—C13—C12  | 108.1 (7) |
| N10—N9—H9A  | 110.1     | C14—C13—H13  | 126.0     |
| N10—N9—H9B  | 110.1     | N16—C14—C13  | 109.6 (7) |
| N9—N10—H10  | 111 (6)   | N16—C14—C15  | 120.1 (7) |
| C17—N10—N9  | 120.0 (7) | C13—C14—C15  | 130.3 (7) |
| C17—N10—H10 | 129 (6)   | C14—C15—H15A | 109.5     |

---

|               |           |               |           |
|---------------|-----------|---------------|-----------|
| C16—N11—Ni    | 131.2 (5) | C14—C15—H15B  | 109.5     |
| C16—N11—C17   | 112.7 (6) | C14—C15—H15C  | 109.5     |
| C17—N11—Ni    | 116.0 (5) | H15A—C15—H15B | 109.5     |
| C17—N12—C18   | 113.9 (7) | H15A—C15—H15C | 109.5     |
| C16—N13—C18   | 113.8 (7) | H15B—C15—H15C | 109.5     |
| C21A—N14—C19A | 119 (2)   | N11—C16—N15   | 115.9 (6) |
| C19B—N14—C21B | 106 (2)   | N13—C16—N11   | 127.6 (7) |
| C18—N14—C19A  | 119 (2)   | N13—C16—N15   | 116.4 (7) |
| C18—N14—C21A  | 121.4 (8) | N11—C17—N10   | 115.6 (7) |
| C18—N14—C19B  | 125 (3)   | N12—C17—N10   | 117.6 (7) |
| C18—N14—C21B  | 120.0 (9) | N12—C17—N11   | 126.8 (8) |
| N16—N15—C12   | 108.3 (6) | N12—C18—N13   | 125.1 (7) |
| N16—N15—C16   | 119.1 (6) | N14—C18—N12   | 118.2 (7) |
| C16—N15—C12   | 131.7 (7) | N14—C18—N13   | 116.7 (7) |
| N15—N16—H16   | 110 (6)   |               |           |

Symmetry code: (i)  $-x+1, -y, -z+2$ .

**Table S4.** Geometric parameters *i.e.* bond lengths and angles (Å, °) for **8**.

---

*Bond lengths*

|           |           |          |           |
|-----------|-----------|----------|-----------|
| O13A—O9A  | 1.74 (3)  | N14—C14  | 1.360 (7) |
| O13A—O10A | 1.25 (3)  | N14—H14  | 0.81 (7)  |
| Zn—O2     | 2.066 (4) | N15—N16  | 1.422 (6) |
| Zn—O3     | 2.048 (4) | N15—C17  | 1.336 (7) |
| Zn—N3     | 2.082 (4) | N15—H15  | 0.81 (6)  |
| Zn—N6     | 2.191 (5) | N16—H16A | 0.93 (5)  |
| Zn—N12    | 2.092 (4) | N16—H16B | 0.81 (6)  |
| Zn—N16    | 2.172 (5) | C1—H1A   | 0.9900    |
| O1—C1     | 1.421 (7) | C1—H1B   | 0.9900    |
| O1—C2     | 1.432 (7) | C1—C4    | 1.527 (7) |
| O2—C12    | 1.253 (6) | C2—H2A   | 0.9900    |
| O3—C8     | 1.277 (6) | C2—H2B   | 0.9900    |
| O4—C20    | 1.418 (7) | C2—C3    | 1.514 (7) |
| O4—C21    | 1.425 (7) | C3—H3A   | 0.9900    |
| N1—C3     | 1.454 (7) | C3—H3B   | 0.9900    |
| N1—C4     | 1.462 (7) | C4—H4A   | 0.9900    |
| N1—C5     | 1.358 (6) | C4—H4B   | 0.9900    |
| N2—C5     | 1.340 (7) | C8—C9    | 1.377 (8) |
| N2—C7     | 1.338 (6) | C9—H9    | 0.9500    |
| N3—C6     | 1.343 (7) | C9—C10   | 1.402 (8) |
| N3—C7     | 1.348 (7) | C10—C11  | 1.488 (9) |
| N4—C5     | 1.347 (7) | C11—H11A | 0.9800    |
| N4—C6     | 1.322 (6) | C11—H11B | 0.9800    |
| N5—N6     | 1.421 (6) | C11—H11C | 0.9800    |
| N5—C7     | 1.334 (7) | C12—C13  | 1.403 (8) |
| N5—H5     | 0.89 (6)  | C13—H13  | 0.9500    |
| N6—H6A    | 0.85 (6)  | C13—C14  | 1.371 (7) |
| N6—H6B    | 0.90 (7)  | C14—C15  | 1.477 (7) |
| N7—N8     | 1.405 (6) | C15—H15A | 0.9800    |
| N7—C6     | 1.378 (7) | C15—H15B | 0.9800    |
| N7—C8     | 1.417 (6) | C15—H15C | 0.9800    |
| N8—C10    | 1.331 (7) | C19—H19A | 0.9900    |
| N9—C18    | 1.346 (6) | C19—H19B | 0.9900    |

---

---

|         |           |          |           |
|---------|-----------|----------|-----------|
| N9—C19  | 1.463 (7) | C19—C20  | 1.507 (8) |
| N9—C22  | 1.463 (7) | C20—H20A | 0.9900    |
| N10—C16 | 1.321 (6) | C20—H20B | 0.9900    |
| N10—C18 | 1.363 (7) | C21—H21A | 0.9900    |
| N11—C17 | 1.338 (6) | C21—H21B | 0.9900    |
| N11—C18 | 1.336 (7) | C21—C22  | 1.509 (8) |
| N12—C16 | 1.332 (6) | C22—H22A | 0.9900    |
| N12—C17 | 1.345 (7) | C22—H22B | 0.9900    |
| N13—N14 | 1.390 (6) | O5—H5A   | 0.99 (6)  |
| N13—C12 | 1.406 (6) | O5—H5B   | 0.99 (2)  |
| N13—C16 | 1.385 (7) |          |           |

*Bond angles*

|               |             |            |           |
|---------------|-------------|------------|-----------|
| O10A—O13A—O9A | 134.2 (17)  | H3A—C3—H3B | 108.3     |
| O2—Zn—N3      | 92.59 (15)  | N1—C4—C1   | 109.3 (5) |
| O2—Zn—N6      | 85.21 (19)  | N1—C4—H4A  | 109.8     |
| O2—Zn—N12     | 86.38 (15)  | N1—C4—H4B  | 109.8     |
| O2—Zn—N16     | 162.92 (16) | C1—C4—H4A  | 109.8     |
| O3—Zn—O2      | 98.17 (15)  | C1—C4—H4B  | 109.8     |
| O3—Zn—N3      | 87.01 (15)  | H4A—C4—H4B | 108.3     |
| O3—Zn—N6      | 165.00 (15) | N2—C5—N1   | 116.2 (5) |
| O3—Zn—N12     | 90.89 (15)  | N2—C5—N4   | 126.5 (4) |
| O3—Zn—N16     | 89.43 (18)  | N4—C5—N1   | 117.3 (5) |
| N3—Zn—N6      | 78.21 (17)  | N3—C6—N7   | 117.6 (4) |
| N3—Zn—N12     | 177.51 (18) | N4—C6—N3   | 126.1 (5) |
| N3—Zn—N16     | 103.11 (17) | N4—C6—N7   | 116.3 (5) |
| N12—Zn—N6     | 103.94 (17) | N2—C7—N3   | 125.9 (5) |
| N12—Zn—N16    | 78.19 (16)  | N5—C7—N2   | 115.0 (5) |
| N16—Zn—N6     | 91.4 (2)    | N5—C7—N3   | 119.0 (4) |
| C1—O1—C2      | 110.3 (4)   | O3—C8—N7   | 124.2 (5) |
| C12—O2—Zn     | 128.8 (3)   | O3—C8—C9   | 130.7 (5) |
| C8—O3—Zn      | 128.2 (3)   | C9—C8—N7   | 105.0 (5) |
| C20—O4—C21    | 110.6 (4)   | C8—C9—H9   | 126.3     |
| C3—N1—C4      | 115.3 (4)   | C8—C9—C10  | 107.4 (5) |
| C5—N1—C3      | 120.8 (5)   | C10—C9—H9  | 126.3     |
| C5—N1—C4      | 121.5 (4)   | N8—C10—C9  | 112.4 (5) |

---

|             |           |               |           |
|-------------|-----------|---------------|-----------|
| C7—N2—C5    | 113.4 (4) | N8—C10—C11    | 120.7 (5) |
| C6—N3—Zn    | 131.2 (3) | C9—C10—C11    | 126.8 (5) |
| C6—N3—C7    | 114.0 (4) | C10—C11—H11A  | 109.5     |
| C7—N3—Zn    | 114.7 (3) | C10—C11—H11B  | 109.5     |
| C6—N4—C5    | 113.9 (4) | C10—C11—H11C  | 109.5     |
| N6—N5—H5    | 119 (4)   | H11A—C11—H11B | 109.5     |
| C7—N5—N6    | 119.9 (5) | H11A—C11—H11C | 109.5     |
| C7—N5—H5    | 121 (4)   | H11B—C11—H11C | 109.5     |
| Zn—N6—H6A   | 120 (4)   | O2—C12—N13    | 123.9 (5) |
| Zn—N6—H6B   | 107 (4)   | O2—C12—C13    | 129.9 (5) |
| N5—N6—Zn    | 108.0 (3) | C13—C12—N13   | 106.2 (4) |
| N5—N6—H6A   | 107 (4)   | C12—C13—H13   | 125.9     |
| N5—N6—H6B   | 112 (4)   | C14—C13—C12   | 108.2 (4) |
| H6A—N6—H6B  | 103 (6)   | C14—C13—H13   | 125.9     |
| N8—N7—C8    | 110.7 (4) | N14—C14—C13   | 109.5 (5) |
| C6—N7—N8    | 118.1 (4) | N14—C14—C15   | 120.8 (4) |
| C6—N7—C8    | 131.1 (4) | C13—C14—C15   | 129.7 (5) |
| C10—N8—N7   | 104.4 (4) | C14—C15—H15A  | 109.5     |
| C18—N9—C19  | 122.1 (4) | C14—C15—H15B  | 109.5     |
| C18—N9—C22  | 122.0 (4) | C14—C15—H15C  | 109.5     |
| C22—N9—C19  | 113.9 (4) | H15A—C15—H15B | 109.5     |
| C16—N10—C18 | 114.0 (4) | H15A—C15—H15C | 109.5     |
| C18—N11—C17 | 114.7 (4) | H15B—C15—H15C | 109.5     |
| C16—N12—Zn  | 131.5 (3) | N10—C16—N12   | 126.9 (5) |
| C16—N12—C17 | 113.8 (4) | N10—C16—N13   | 116.2 (4) |
| C17—N12—Zn  | 114.5 (3) | N12—C16—N13   | 116.8 (4) |
| N14—N13—C12 | 108.1 (4) | N11—C17—N12   | 125.6 (5) |
| C16—N13—N14 | 118.9 (4) | N15—C17—N11   | 116.4 (5) |
| C16—N13—C12 | 132.3 (4) | N15—C17—N12   | 118.0 (4) |
| N13—N14—H14 | 117 (5)   | N9—C18—N10    | 116.8 (4) |
| C14—N14—N13 | 107.9 (4) | N11—C18—N9    | 118.3 (5) |
| C14—N14—H14 | 125 (5)   | N11—C18—N10   | 124.9 (4) |
| N16—N15—H15 | 119 (4)   | N9—C19—H19A   | 109.8     |
| C17—N15—N16 | 120.3 (5) | N9—C19—H19B   | 109.8     |
| C17—N15—H15 | 121 (4)   | N9—C19—C20    | 109.6 (5) |

---

|               |           |               |           |
|---------------|-----------|---------------|-----------|
| Zn—N16—H16A   | 118 (3)   | H19A—C19—H19B | 108.2     |
| Zn—N16—H16B   | 108 (4)   | C20—C19—H19A  | 109.8     |
| N15—N16—Zn    | 107.5 (3) | C20—C19—H19B  | 109.8     |
| N15—N16—H16A  | 104 (3)   | O4—C20—C19    | 111.5 (5) |
| N15—N16—H16B  | 107 (4)   | O4—C20—H20A   | 109.3     |
| H16A—N16—H16B | 113 (5)   | O4—C20—H20B   | 109.3     |
| O1—C1—H1A     | 109.3     | C19—C20—H20A  | 109.3     |
| O1—C1—H1B     | 109.3     | C19—C20—H20B  | 109.3     |
| O1—C1—C4      | 111.7 (5) | H20A—C20—H20B | 108.0     |
| H1A—C1—H1B    | 107.9     | O4—C21—H21A   | 109.2     |
| C4—C1—H1A     | 109.3     | O4—C21—H21B   | 109.2     |
| C4—C1—H1B     | 109.3     | O4—C21—C22    | 111.8 (5) |
| O1—C2—H2A     | 109.3     | H21A—C21—H21B | 107.9     |
| O1—C2—H2B     | 109.3     | C22—C21—H21A  | 109.2     |
| O1—C2—C3      | 111.6 (5) | C22—C21—H21B  | 109.2     |
| H2A—C2—H2B    | 108.0     | N9—C22—C21    | 110.3 (5) |
| C3—C2—H2A     | 109.3     | N9—C22—H22A   | 109.6     |
| C3—C2—H2B     | 109.3     | N9—C22—H22B   | 109.6     |
| N1—C3—C2      | 109.0 (5) | C21—C22—H22A  | 109.6     |
| N1—C3—H3A     | 109.9     | C21—C22—H22B  | 109.6     |
| N1—C3—H3B     | 109.9     | H22A—C22—H22B | 108.1     |
| C2—C3—H3A     | 109.9     | H5A—O5—H5B    | 104 (6)   |
| C2—C3—H3B     | 109.9     |               |           |

---
